1

2 Tuning of ventral tenia tecta neurons of the olfactory cortex to distinct  
3 scenes of feeding behavior

4

5 **Authors:**

6 Kazuki Shiotani<sup>1,2\*</sup>, Hiroyuki Manabe<sup>1\*</sup>, Yuta Tanisumi<sup>1</sup>, Koshi Murata<sup>1,3</sup>, Junya  
7 Hirokawa<sup>1</sup>, Yoshio Sakurai<sup>1</sup>, and Kensaku Mori<sup>4</sup>

8

9 <sup>1</sup> Laboratory of Neural Information, Graduate School of Brain Science, Doshisha  
10 University, Kyoto, Japan

11 <sup>2</sup> Research Fellow of the Japan Society for the Promotion of Science, Tokyo, Japan

12 <sup>3</sup> Division of Brain Structure and Function, Faculty of Medical Sciences, University of  
13 Fukui, Fukui, Japan

14 <sup>4</sup> The University of Tokyo, Tokyo, Japan

15 \* These authors contributed equally to this work

16

17 **Corresponding author:**

18 **Hiroyuki Manabe, Ph.D.**

19 Laboratory of Neural Information, Graduate School of Brain Science, Doshisha  
20 University, Kyoto, Japan

21

22 Phone: +81-774-65-7181

23 Email: [hmanabe@mail.doshisha.ac.jp](mailto:hmanabe@mail.doshisha.ac.jp)

24

25 **Number of pages:** 31 pages.

26

27 **Number of Figures:** 8 figures

28

29 **Number of words:** Abstract, 260 words; Introduction, 691 words; Discussion, 2,127  
30 words.

31

32 **Conflict of Interest:** The authors declare no competing financial interests.

33

34 **Acknowledgments:**

35 We thank the members of the Sakurai lab for valuable discussion. And we thank Hideki  
36 Tanisumi for providing illustrations in Figs 1a and 4a. K.S. was supported by JSPS

37 KAKENHI Grant Numbers 18J21358, H.M. was supported by the Takeda Science  
38 Foundation, Narishige Neuroscience Research Foundation, and JSPS KAKENHI Grant  
39 Numbers 25135708, 16K14557. Y.S. was supported by JSPS KAKENHI Grant  
40 Numbers 16H02061.

41

42

43 **Short title:** Scene cells in the olfactory cortex

44

45

46 **Abstract**

47

48 Ventral tenia tecta (vTT) is a part of the olfactory cortex that receives both olfactory  
49 sensory signals from the olfactory bulb and top-down signals from the prefrontal cortex.  
50 To address the question whether and how the neuronal activity of the vTT is modulated  
51 by prefrontal cognitive processes such as attention, expectation and working memory  
52 that occurs during goal-directed behaviors, we recorded individual neuronal responses  
53 in the vTT of freely moving awake mice that performed learned odor-guided feeding  
54 and drinking behaviors. We found that the firing pattern of individual vTT cells had  
55 repeatable behavioral correlates such that the environmental and behavioral scene the  
56 mouse encountered during the learned behavior was the major determinant of when  
57 individual vTT neurons fired maximally. Furthermore, spiking activity of these scene  
58 cells was modulated not only by the present scene but also by the future scene that the  
59 mouse predicted. We show that vTT receives afferent input from the olfactory bulb and  
60 top-down inputs from the medial prefrontal cortex and piriform cortex.

61 These results indicate that different groups of vTT cells are activated at different  
62 scenes and suggest that processing of olfactory sensory information is handled by  
63 different scene cells during distinct scenes of learned feeding and drinking behaviors. In  
64 other words, during the feeding and drinking behavior, vTT changes its working mode  
65 moment by moment in accord with the scene change by selectively biasing specific  
66 scene cells. The scene effect on olfactory sensory processing in the vTT has  
67 implications for the neuronal circuit mechanisms of top-down attention and  
68 scene-dependent encoding and recall of olfactory memory.

69

70

## 71 **Introduction**

72

73 In mammals, olfactory sensory information detected by sensory neurons in the olfactory  
74 epithelium is transmitted via the olfactory bulb to the olfactory cortex. Mitral and tufted  
75 cells in the olfactory bulb project axons directly to various areas of the olfactory cortex  
76 that includes anterior olfactory nucleus, ventral and dorsal tenia tecta, dorsal peduncular  
77 cortex, anterior piriform cortex, olfactory tubercle, posterior piriform cortex, nucleus of  
78 the lateral olfactory tract, anterior cortical amygdaloid nucleus, posterolateral cortical  
79 amygdaloid nucleus, and lateral entorhinal area (Neville and Haberly, 2004; Igarashi et  
80 al., 2012).

81 Despite the accumulation of knowledge about how odors are coded by olfactory  
82 sensory neurons (Buck and Axel, 1991) and how olfactory sensory signals are processed  
83 by neural circuits in the olfactory bulb and olfactory cortex (Mori and Sakano, 2011,  
84 Wilson and Sullivan, 2011, Mori et al., 2013), little is known about how olfactory  
85 cortical areas translate olfactory sensory information into behavioral responses (Choi et  
86 al., 2011). In this study, we focused on the ventral tenia tecta (vTT), an unexplored area  
87 of the olfactory cortex located at the ventromedial part of olfactory peduncle, and asked  
88 the question how the vTT translates odor signals from foods and environment into  
89 behaviors that are related to obtaining and consuming food and water.

90 vTT has a three-layered cortical structure (Haberly and Price, 1978, Brunjes et al.,  
91 2011). Principal neurons in the vTT are pyramidal cells that receive olfactory bulb  
92 inputs onto apical tuft dendrites in layer Ia, and Ib-association fiber inputs from other  
93 areas of the olfactory cortex. In addition, proximal apical dendrites and basal dendrites  
94 (in layers II and III) of vTT pyramidal cells receive deep association fiber inputs from  
95 the piriform cortex and top-down inputs from the medial prefrontal cortex (Luskin and  
96 Price, 1983; Hoover and Vertes, 2011). In this study, we demonstrate the connectivity  
97 pattern of vTT using a retrograde tracer. vTT receives inputs from the olfactory bulb,  
98 anterior piriform cortex, posterior piriform cortex, and medial prefrontal cortex. vTT  
99 massively projects axon to the olfactory bulb, anterior olfactory nucleus, and anterior  
100 piriform cortex.

101 Physiological studies of visual, auditory and somatosensory cortices showed that  
102 neurons of the neocortical sensory areas receive not only sensory signals from the  
103 external world but also top-down signals generated internally by higher level cognitive  
104 processes, including attention, expectation, working memory and decision making  
105 (Gilbert and Sigman, 2007; Roelfsema and deLange, 2016). In the olfactory cortical  
106 areas, olfactory tubercle neurons represent goal-directed behaviors and show enhanced

107 odor responses when rats selectively direct attention to odors (Gadziola & Wesson,  
108 2016; Carlson et al., 2018) and c-fos activity of these neurons changes with different  
109 motivated behaviors (Murata et al., 2015).

110 We therefore supposed that neurons in the vTT not only receive olfactory sensory  
111 inputs from the olfactory bulb but might be also influenced by top-down inputs  
112 generated in association with higher cognitive processes that are necessary for  
113 performing goal-directed behaviors including feeding and drinking behaviors (Bushman  
114 and Miller, 2014).

115 To address the question whether vTT neurons receive top-down signals in association  
116 with higher level cognitive processing, we recorded spiking activity of vTT neurons  
117 during odor-guided feeding and drinking behaviors. We trained mice to perform two  
118 types of odor-guided behaviors in two tasks. One group of mice were trained to  
119 associate an odor (either eugenol or vanilla essence) with sugar reward. We also trained  
120 these mice to associate a different odor (almond essence) with aversive consequences  
121 after sugar eating, i.e., intraperitoneal injection of lithium chloride (Rainecki et al., 2009).  
122 The other group of mice were trained to associate an odor (eugenol) in the odor port  
123 with the appearance of water reward in the reward port that is located at the left of the  
124 odor port. These mice were trained to associate a different odor (amyl-acetate) in the  
125 odor port with no-reward in the reward port.

126 Analysis of firing pattern of vTT neurons during the feeding and drinking behaviors  
127 showed clear tuning of individual neurons to distinct scenes (i.e., distinct environmental  
128 and behavioral contexts) of learned behaviors. The results indicate that the function of  
129 vTT is not fixed but changes moment by moment in a scene-dependent manner during  
130 the whole sequence of feeding and drinking behaviors.

131

132

133 **Results**

134

135 **Scene specific activity of vTT cells during the odor-guided eating or no-eating task**

136 Mice were trained to perform an odor-guided behavioral task that required decision  
137 making between eating or no-eating based on the presented odor cue (Fig. 1a). We  
138 randomly presented sugar on a dish with one of three different cue odors (eugenol,  
139 vanilla essence, or almond essence) at an arbitrary position in the test cage. In the  
140 training sessions, eugenol odor and vanilla odor were associated with sugar reward,  
141 whereas almond odor was associated with sugar and aversive consequence (LiCl  
142 injection). After the learning, mice showed high accuracy rate ( $> 0.8$ ) of eating or  
143 no-eating behavioral response to the cue odor throughout the session (Fig. 1b, 5  
144 trials/block, average for 63 sessions from 6 mice). We presented also powder chow on a  
145 dish in trials that were randomly inserted among the above trials.

146 When the food dish was presented, the mouse approached the dish, and upon arrival at  
147 the dish the mouse showed either eating behavior or no-eating behavior depending on  
148 the odors attached to the food dish (Fig. 1a). We defined approaching scene as the time  
149 window between the start of approach behavior and the arrival at the food dish. We also  
150 defined eating scene as the time window between the arrival at the food dish and the end  
151 of eating, and no-eating scene as the time window between the arrival at the dish and 10  
152 sec after the arrival during which the mouse did not eat any food. Average duration of  
153 the approaching scene was 3.5 sec in case of odor-guided eating behavior and 2.9 sec in  
154 case of odor-guided no-eating behavior. At the timing about 6.0 sec after the mouse  
155 started to eat in eating trials, we suddenly deprived the food dish even though the mouse  
156 was in the middle of eating. We defined deprivation scene as the time window between  
157 the moment of the food deprivation and 5 sec after the deprivation.

158

159 We measured spiking activity of individual vTT cells in six mice using extracellular  
160 tetrode recordings while the mice performed the eating and no-eating tasks (Fig. 1c). To  
161 examine the behavioral correlate of vTT cell firing pattern, we first selected vTT cells  
162 whose average firing rate during the trials was greater than 0.3 Hz for further analysis ( $n$   
163 = 391 cells in total 63 sessions).

164 To assess firing pattern change of the vTT cells during the scene development of the  
165 eating task and no-eating task, we calculated peri-event time histograms (PETH) of the  
166 spiking activity of individual vTT cells with reference to the timing of arrival at the  
167 food dish or the timing of food deprivation. We compared the firing pattern of 391 vTT  
168 cells and noticed two types of cells that showed firing pattern change in opposite

169 directions during the scene development.

170 One type of vTT cells were characterized by their increased spiking rate during the  
171 eating scene (Fig. 1d). These cells increased their spiking activity when the mouse  
172 arrived at the dish and started to eat sugar or powder chow and continued the increased  
173 spiking activity during the eating scene until the food deprivation (Fig. 1d left). These  
174 cells rapidly decreased the spiking activity when the food dish was deprived (Fig. 1d  
175 right). Because the maximal firing of these cells occurred during the eating scene and  
176 such high-frequency firing was absent in the absence of eating scene in no-eating task,  
177 we called these cells eating scene cells. A majority of eating scene cells fired maximally  
178 during the eating scene regardless of the odor type (eugenol odor, vanilla essence odor  
179 or powder chow odor) used for food cue and regardless of the taste of food (sugar or  
180 powder chow).

181 Another type of vTT cells showed decreased firing rate during the eating scene (Fig.  
182 1e). These cells decreased spiking activity upon the arrival at the dish (Fig. 1e, left), and  
183 the suppression of spiking activity continued during the eating scene until the food was  
184 deprived (Fig. 1e, right). In response to the food deprivation, these cells rapidly  
185 increased the spiking activity. Because the maximal firing of these cells occurred during  
186 either the approaching scene or the food deprivation scene, we called these cells  
187 instrumental scene cells.

188 Although the food dish was presented at a randomly selected place in the cage in each  
189 trial, the eating scene cells fired maximally whenever and wherever the mouse ate the  
190 food, suggesting that the maximal firing of these vTT cells relate to the eating scene but  
191 not to the mouse's place in the cage (c.f. hippocampal place cells, O'Keef, 2007).

192

193 To classify the firing patterns of vTT cells during the scene development, we used  
194 principal component analysis (PCA) of the firing pattern of 391 vTT cells followed by  
195 unsupervised, hierarchical clustering (Fig. 2a). This analysis showed two major clusters  
196 of cells that were separated according to the magnitude of firing in distinct scenes (Fig.  
197 2b). Cells in type 1 cluster were eating scene cells showing maximal firing during eating  
198 scene (Fig. 2a light blue lines in the dendrogram and 2b top). Two hundred and twelve  
199 vTT cells (54.2 %) were classified as type 1 cluster eating scene cells using this  
200 clustering method. We observed that many of these eating scene cells began to increase  
201 their firing rate before the mouse touched the food dish, indicating that the firing rate  
202 increase of these eating scene cells during the pre-touch period was not caused by actual  
203 food intake (Fig. 2b top).

204 Cells in type 2 cluster were instrumental scene cells showing increased firing rate

205 during the approaching and food deprivation scenes and decreased firing rate during the  
206 eating scene (Fig. 2a red lines, 2b bottom). These instrumental scene cells rapidly  
207 increased the firing rate around the timing of food deprivation. One hundred and  
208 seventy-nine vTT cells (45.8 %) were classified as type 2 cluster instrumental scene  
209 cells.

210 Many instrumental scene cells began to decrease their firing rate before the mice  
211 touched the food dish (Fig.2b bottom), indicating that the firing rate decrease during the  
212 pre-touch period was not due to sensory inputs caused by actual food intake.  
213 Furthermore, these cells suddenly increased their firing rate before the food was  
214 deprived (Fig. 2b bottom), indicating that the firing rate increase during the  
215 pre-deprivation period was not caused by actual food deprivation.

216

217 These eating scene cells and instrumental scene cells showed only a minor change in  
218 firing rate when the mouse detected learned aversive odor (almond) and did not show  
219 eating behavior (Fig 1d, e, and Fig 2c, and d). To quantify the firing rate change of the  
220 scene cells at the transitions from approach scene to eating scene and from approach  
221 scene to no-eating scene, we aligned the firings of vTT cells in reference to the timing  
222 when the mouse arrived at the dish and examined the attached odor (3.5 sec on average  
223 after the start of approach behavior). We compared the average firing rate during a late  
224 approaching scene (from 1.5 to 3.5 sec on average after the start) with that during an  
225 early eating scene (from 3.5 to 5.5 sec on average after the start) in each scene cell (Fig.  
226 2e). Forty-three percent of eating scene cells showed a significant increase of average  
227 firing during the early eating scene (E in Fig. 2e, upper left graph) compared with that  
228 during the late approaching scene (A in Fig. 2e, upper left graph) in eating trials. In the  
229 absence of eating scene in the no-eating trials, the average firing rate of these cells  
230 showed no significant change during an early no-eating scene (from 3.5 to 5.5 sec on  
231 average after the start of approach) compared with that during the late approaching  
232 scene (Fig. 2d top and 2e, upper right graph).

233 Sixty-nine percent of instrumental scene cells showed a significant decrease in average  
234 spiking activity in an early eating scene compared with the late approaching scene in  
235 eating trials, whereas the firing rate of these cells showed no significant change in the  
236 early no-eating scene in no-eating trials (Fig. 2d bottom and 2e, lower graphs). These  
237 results indicate that eating scene cells and instrumental scene cells receives nearly  
238 opposite influences at the transition from approach scene to eating scene, and that this  
239 influence is absent at the transition from approach scene to no-eating scene.

240

241 Although individual scene cells showed maximal firing rate in a specific scene, each  
242 scene cell showed a variety of firing pattern within the scene (Fig. 2a). To compare the  
243 firing profile of recorded scene cells, we aligned vTT cells by the timing of maximal  
244 firing as a function of scene development (Fig. 3). We found that individual vTT scene  
245 cells were tuned to a smaller scale scene or sub-scene within the eating scene or the  
246 instrumental scene. For example, some approaching scene cells were tuned to the early  
247 part of the approaching scene, while other approaching scene cells showed maximal  
248 firing rate at the late part of the approaching scene. A subset of eating scene cells  
249 showed maximal firing rate at the initial part of the eating scene, whereas another subset  
250 of eating scene cells were tuned to the middle part of the eating scene and the third  
251 subset of eating cells to the end part of the eating scene just before the food deprivation.  
252 We noted also the possibility that the recorded vTT cells represent all the scenes and  
253 sub-scenes that develop during the odor-guided eating task, which prompted us to  
254 define scenes and sub-scenes in more detail.

255

#### 256 **Scene specific activity of vTT cells during the odor-guided Go/No-go task**

257 To examine in more detail the scene- and sub-scene- dependency of maximal firing of  
258 individual vTT cells, we planned an odor-guided Go/No-go task to obtain water reward  
259 (Fig. 4a), in which we were able to define precisely the time window of approaching  
260 scene, odor checking scene, moving scene, waiting scene and water drinking scene. In  
261 this task, illumination of light at the right odor port instructed the mouse to start the task  
262 and approach to and nose poke into the odor port (approaching scene). Starting at the  
263 moment of the nose poke, one of cue odors was presented for 500 ms in the odor port.  
264 The mouse was required to sniff the cue odor and then keep nose poking for 500 ms  
265 after the cessation of odor stimulation. At 1 second after the onset of odor stimulation,  
266 the light was turned off and the mouse could withdraw its nose from the odor port. The  
267 period between the nose poke into and nose withdrawal from the odor port was defined  
268 as odor checking scene.

269 If go-cue odor (eugenol) was presented, the mouse was required to move to and poke  
270 its head into the left water port within 2 sec to obtain water reward. The period of  
271 moving from the odor port to the water port was defined as moving scene. At the water  
272 port, the mouse was required to keep its head in the port for 300 msec to wait for water  
273 delivery (waiting scene). Three hundred msec after the head poke, a drop of water (6  $\mu$ l)  
274 was delivered (Fig 4a-1). Drinking scene was defined as the 1.2 sec period from the start  
275 of water delivery.

276 If no-go-cue odor (amyl acetate) was presented, the mouse was prohibited from poking



277 its head into the water port for 2 sec after the end of odor delivery (No-go scene) (Fig.  
278 4a-2). After mice were well trained, the behavioral accuracy kept more than 80% in a  
279 block (20 trials / block) throughout a session (average for 57 sessions from 6 mice, Fig.  
280 4b).

281

282 We recorded the spiking activity of a total of 346 vTT cells from six mice using  
283 tetrodes while mice performed the odor-guided Go/No-Go task (Fig. 4c). To examine  
284 the relation of firing rate change of individual vTT cells to the development of  
285 behavioral scenes, we first selected a total of 288 vTT cells whose average firing rate  
286 during the trials was greater than 0.3 Hz for further analysis.

287 To classify the firing patterns of vTT cells during the scene development in the go  
288 trials, we used PCA of the firing pattern of vTT cells followed by unsupervised  
289 hierarchical clustering (Fig. 5a). This yielded six major clusters of cells. Four clusters of  
290 them showed highly increased firing rate in one or two specific scenes (Fig. 5a, b, light  
291 blue, red, dark green and pink) whereas two clusters showed highly increased firing rate  
292 in more than two scenes (Fig. 5a, b, yellow and light green).

293 In the PCA of firing pattern of 288 vTT cells, 64 cells (22.2 %) were sorted into  
294 approaching and moving scene cell cluster (light blue cluster in Fig. 5a, b). Average  
295 firing rate of cells in this cluster was significantly higher in both the approaching scene  
296 and moving scene. A typical example of cells in this cluster is shown at the top  
297 histogram of Fig. 5c. This cell showed maximal firing during moving scene and high  
298 firing rate during approaching scene, whereas it showed diminished spiking activity  
299 during odor checking scene, waiting scene, and drinking scene.

300 The PCA sorted 76 cells (26.4 %) into odor checking scene cell cluster, and average  
301 firing rate of cells in this cluster was maximal in the odor checking scene (red cluster in  
302 Fig. 5a, b, an example is shown at the 2<sup>nd</sup> histogram from the top in c). The firing rate of  
303 the odor checking scene cells was lower during the drinking scene.

304 The PCA sorted 13 cells (4.5 %) into waiting scene cell cluster, and average firing rate  
305 of cells in this cluster was maximal in the waiting scene (dark green cluster in Fig. 5 a, b,  
306 an example is shown at the 3<sup>rd</sup> histogram from the top in Fig. 5c).

307 The PCA sorted 32 cells (11.1 %) into drinking scene cell cluster. The average firing  
308 rate of cells in this cluster was maximal in the drinking scene (pink cluster in Fig. 5a, b,  
309 an example is shown at the bottom histogram in Fig. 5c). These drinking scene cells  
310 showed diminished spiking activity during odor checking scene. Thus odor checking  
311 scene cells and drinking scene cells showed firing rate change in nearly opposite  
312 directions during the scene development.

313

314 As shown in Fig. 5a-c, a majority of odor checking scene cells (red) began to increase  
315 the firing rate before the start of the odor checking scene, i.e., before the mouse poked  
316 its nose into the odor port and smelled the cue odor. This observation indicates that the  
317 firing rate increase in odor checking scene cells before the start of odor checking scene  
318 is not caused by the olfactory sensory input of the delivered cue odor.

319 Many waiting scene cells (dark green) began to increase the firing rate before the start  
320 of the waiting scene, i.e., before the mouse poked its mouth into the reward port,  
321 suggesting that the firing rate increase in waiting scene cells just before the waiting  
322 scene is not due to odors from the inside of the reward port. Furthermore, many  
323 drinking scene cells (pink) began to increase their firing rate before the start of the  
324 drinking scene, i.e., before the water came out from the tube, indicating that the  
325 increased firing rate just before the drinking scene is not due to the olfactory sensory  
326 inputs from the water. In summary, while an individual vTT scene cell fires maximally  
327 within the scene the cell is in charge of, many of the scene cells begin to increase  
328 spiking activity before the actual scene starts.

329

330 To further examine the relation of vTT cell firing with scene development, we selected  
331 185 vTT cells that showed clear tuning to one or two specific scenes and aligned these  
332 vTT cells by the timing of maximal firing as a function of scene development during the  
333 task (Fig. 6a). We found that individual vTT scene cells were tuned maximally to a  
334 smaller scale scene or sub-scene within each behavioral scene. For example, different  
335 odor checking scene cells were tuned maximally to different sub-scene within the odor  
336 checking scene. Distinct drinking scene cells showed maximal tuning to different  
337 sub-scene within the drinking scene. Surprisingly, the repertoire of maximal tuning of  
338 these vTT cells covered virtually all the continuing series of scenes and sub-scenes of  
339 the odor-guided reward-directed behavior (Fig. 6a).

340 We expected that, when a go-cue odor was presented in the go trials, the odor checking  
341 scene consisted of an odor sniffing sub-scene, a proactive sub-scene when the mouse  
342 was sniffing the go-cue odor, and a subsequent reward predicting sub-scene, a reactive  
343 sub-scene when the mouse was predicting the emergence of reward in the reward port  
344 based on the go-cue odor. However, observation of the mouse's behavior did not allow  
345 us to determine the exact timing of the initiation of the reward predicting sub-scene. We  
346 also expected that, in the trial in which a no-go-cue odor was presented, the odor  
347 checking scene consisted of an odor sniffing sub-scene and a subsequent no-reward  
348 predicting sub-scene although we could not determine exact initiation timing of the

349 no-reward predicting sub-scene. Therefore, to examine the relation between the  
350 sub-scenes and the firing pattern we divided the odor checking scene into the odor  
351 presentation period (red bar in Fig. 6) during which odor sniffing sub-scene may  
352 dominate and the odor cessation period (green bar in Fig. 6) during which reward or  
353 no-reward predicting sub-scene may dominate.

354

355 We compared the firing pattern of the odor checking scene cells between go trials and  
356 no-go trials (Fig. 6b, c). During the odor presentation period (red in Fig. 6) only 21.1%  
357 of odor checking scene cells showed significantly different firing rate between go trials  
358 and no-go trials. In contrast, during the odor cessation period, 61.8% of odor checking  
359 scene cells showed significantly different firing rate between them (green in Fig. 6). We  
360 thus focused on the odor cessation period. Among the odor checking scene cells that  
361 showed significantly different firing rate between go and no-go trials, a majority of cells  
362 (87.2%, 41/47 cells) showed higher firing rate during the odor cessation period of go  
363 trials compared with that of no-go trials (compare left and right charts in Fig. 6a). Only  
364 a small number of odor checking scene cells (12.8%, 6/47 cells) showed higher firing  
365 rate during the odor cessation period of no-go trials compared with that of go-trials.

366 Fig. 6b shows an example of odor checking scene cell showing higher firing rate  
367 during go trials compared with no-go trials. This odor checking scene cell started to  
368 show higher firing rate in go-trials (blue line) at the odor presentation period and  
369 continued the higher firing rate during the subsequent odor cessation period.

370 These results indicate that the firing pattern of odor checking scene cells differ clearly  
371 depending on the odor-guided prediction of the future scene. Many odor checking scene  
372 cells showed higher firing rate during the presumptive reward predicting sub-scene after  
373 go-odor stimulation whereas they showed lower firing rate during the presumptive  
374 no-reward predicting sub-scene after no-go odor stimulation.

375 We also observed that some approaching and moving scene cells, waiting scene cells  
376 and drinking scene cells showed significantly different firing rate between go trials and  
377 no-go trials during odor cessation period, whereas they presented no significant change  
378 in firing rate during approaching scene and odor presentation period (Fig. 6c). These  
379 results suggest that some scene cells start to increase their firing rate at the scene when  
380 the mouse is predicting the future scenes that lead to the goal scene of the task (drinking  
381 and eating). These results suggest that the activity of scene cells in the vTT represents  
382 not only a present scene but also future scenes the mouse predicts (Sharpe &  
383 Schoenbaum, 2016).

384

385 **Cell types and connection pattern of the vTT**

386 Although a majority of neurons in layer II of the vTT are pyramidal cells, vTT also  
387 contains other cell types (Haberly and Price 1978, Nevil and Haberly 2004). To examine  
388 the distribution of glutamatergic cells and GABAergic cells in the vTT, we performed *in*  
389 *situ* hybridization for mRNA of vesicular glutamate transporter 1 (VGluT1) and  
390 glutamic acid decarboxylase (GAD) 65/67 in the vTT (Fig. 7a, b). About 86% of the  
391 vTT cells were *VGluT1*-positive (from three mice), while about 8% of the vTT cells  
392 were *GAD65/67*-positive (from three mice). This suggests that principal neurons of the  
393 VTT are glutamatergic pyramidal cells.

394 It has been reported that vTT have reciprocal connections with the olfactory bulb (OB),  
395 anterior piriform cortex (APC), and posterior piriform cortex (PPC) (Luskin and Price  
396 1983a,b, Igarashi et al, 2012). In addition, the deep layers of the vTT receive top-down  
397 inputs from the medial prefrontal cortex (mPFC) (Hoover and Vertes, 2011). To further  
398 examine cortical areas that project axons to the vTT, we injected a retrograde tracer,  
399 cholera toxin B subunit (CTB) conjugated with Alexa 555, into the mouse vTT (Fig. 7c).  
400 A number of retrogradely-labelled (CTB-positive) cell bodies were identified in the OB,  
401 APC, PPC, and mPFC, whereas CTB-positive cell bodies were hardly observed in the  
402 anterior olfactory nucleus (AON), which is located just dorsal to the vTT (Fig. 7d).

403 To examine cortical areas that receive axonal projection from vTT cells, we injected  
404 CTB into the mPFC, OB, AON, olfactory tubercle (OT), APC, and PPC. We then  
405 counted retrogradely labelled CTB-positive cells in the vTT (Fig. 7e, f). Many vTT cells  
406 were retrogradely labelled from the OB, AON, and APC, but only a few cells were  
407 retrogradely labelled from the OT and PPC. Retrogradely labeled cells were very scarce  
408 in the vTT following injection of CTB into the mPFC. These results indicate that, in  
409 addition to the heavy reciprocal connection with the OB, the vTT projects axons to the  
410 AON and APC and receives top-down projections from the APC, PPC and mPFC (Fig.  
411 7g).

412

413 **Discussion**

414

415 **Scene cells in the vTT**

416 Present results demonstrate characteristic tuning of individual vTT cells of the  
417 olfactory cortex to the scene the mouse encounters during the learned feeding and  
418 drinking behaviors; individual vTT cells fired maximally whenever the mouse faced to a  
419 particular scene of the learned behavior. Because most of recorded vTT cells showed the  
420 clear scene-selectivity of their maximal firing, we named these cells “scene cells”.

421 In the odor-guided eating or no-eating task (Figs 1-3), eating scene cells in the vTT  
422 fired maximally during the eating scene, whereas they tended to be silent during the  
423 instrumental scene (approaching scene and food deprivation scene). In a striking  
424 contrast, instrumental scene cells fired maximally during either the approaching scene  
425 or the food deprivation scene. These instrumental scene cells were nearly silent during  
426 the eating scene.

427 In the odor-guided go task to drink water (Figs 4-6), we classified vTT cells into  
428 approaching and moving scene cells, odor checking scene cells, waiting scene cells, and  
429 drinking scene cells based on their firing pattern during the go trials. Approaching and  
430 moving scene cells fired maximally at the scene when either the mouse approached to  
431 the odor port or moved from the odor port to the water port. Odor checking scene cells  
432 fired maximally at the scene when the mouse examined the odor cue in the odor port.  
433 Waiting scene cells fired maximally at the scene when the mouse waited water to come  
434 out from the tube, and finally, drinking scene cells fired maximally at the scene when  
435 the mouse took the water reward. Therefore, a majority of neurons in the vTT showed  
436 maximal firing at a particular scene, suggesting ‘one cell - one scene’ relationship in  
437 these cells. However, we also noted that a subset of vTT cells showed highly increased  
438 firing rate at two or more different scenes (Fig. 5a, b).

439 The presence of scene cells suggests critical roles of contextual scene information in  
440 olfactory sensory processing in the vTT. vTT cells send the axon to other olfactory  
441 cortical areas such as AON and piriform cortex (Fig. 7, Haberly and Price 1978, Luskin  
442 and Price 1983). Further experiments are needed to determine whether other areas of the  
443 olfactory cortex contain scene cells. It is also of great interest to examine whether the  
444 gustatory cortex and the oral area of the somatosensory cortex contain scene cells that  
445 fire maximally during a specific scene of the feeding and drinking behaviors.

446

447 **Scene-dependent olfactory sensory processing**

448 What are the possible functions of vTT scene cells with respect to olfactory sensory

449 processing? Pyramidal cells are principal neurons in the vTT and extend apical tuft  
450 dendrites to the most superficial layer (layer Ia) (Fig. 8) (Haberly and Price 1978). The  
451 apical tuft dendrites receive excitatory synaptic input in layer Ia from axon terminals of  
452 mitral cells of the olfactory bulb (Friedman and Price 1984, Igarashi et al 2012,  
453 Nagayama et al, 2010), and excitatory synaptic inputs in layer Ib from Ib association  
454 fibers of other pyramidal cells of the olfactory cortex (Luskin and Price 1983). These  
455 synaptic inputs on apical tuft dendrites in layer I may convey olfactory sensory  
456 information directly from the olfactory bulb or indirectly after the relay in olfactory  
457 cortex areas.

458 In addition, vTT pyramidal cells extend basal dendrites and proximal apical oblique  
459 dendrites in layers II and III receiving top-down inputs from medial prefrontal cortex  
460 (Hoover and Vertes 2011) and top-down deep association fiber inputs from the piriform  
461 cortex. Therefore, individual pyramidal cells in the vTT receive olfactory sensory inputs  
462 and top-down inputs on spatially well-segregated compartments of dendrites (Fig. 8).

463 It has been shown that pyramidal cells in the neocortex can detect the occurrence of  
464 near-simultaneous synaptic inputs impinging on spatially segregated dendritic  
465 compartments and generate action-potential bursts in response to the coincident  
466 synaptic inputs (Larkum et al., 1999; Stuart & Spruston, 2015; Hill et al., 2013;  
467 Sakmann, 2017). Therefore, neocortical pyramidal cells have the capacity for  
468 coincidence detection of spatially separated subthreshold synaptic inputs.

469 Because pyramidal cells in the vTT have dendritic morphology similar to neocortical  
470 pyramidal cells, we speculate that vTT pyramidal cells are capable for coincidence  
471 detection of spatially segregated synaptic inputs; i.e., coincident detection of olfactory  
472 sensory inputs on apical tuft dendrites in layer I and top-down inputs on basal dendrites  
473 and proximal apical oblique dendrites in layers II and III (Fig. 8).

474

475 During the approaching scene, approaching and moving scene pyramidal cells may  
476 receive top-down excitatory synaptic input in deep layers (layers II and III). If the  
477 approaching and moving scene pyramidal cells receive olfactory sensory input in layer I  
478 during the approaching scene, the top-down input may augment or multiply responses to  
479 the olfactory sensory input. In other words, the approaching and moving scene  
480 pyramidal cells may function as coincidence detectors and respond to the two coincident  
481 inputs with action-potential bursts during the approaching scene. On the other hand, a  
482 majority of odor checking scene cells, waiting scene cells and drinking scene cells do  
483 not receive top-down excitatory synaptic input during the approaching scene. Therefore,  
484 these scene cells may not respond or show only a weak spike responses to the olfactory

485 sensory input during the approaching scene. Only approaching and moving scene cells  
486 can function as coincidence detector during approaching scene.

487 Similarly, during odor checking scene, only odor checking scene cells can function as  
488 the coincidence detector between olfactory sensory input and top-down synaptic input.  
489 Only waiting scene cells, and drinking scene cells can function as coincidence detector  
490 during the waiting scene and drinking scene, respectively. In this way, different scene  
491 cells in the vTT may function as coincidence detector of top-down synaptic input and  
492 bottom-up olfactory sensory input only during the corresponding scene. Thus during a  
493 particular scene of the learned feeding behavior, olfactory sensory information appears  
494 to be handled and processed mainly by corresponding scene cells in the vTT (Fig. 8). In  
495 other words, the mode of olfactory sensory processing in the vTT changes moment by  
496 moment in scene-dependent manner such that distinct scene cells are selected in each  
497 scene and assigned to olfactory sensory processing.

498 We propose that individual vTT pyramidal cells are scene-dependent coincidence  
499 detectors, integrating bottom-up olfactory sensory signals with top-down scene signals  
500 only during a particular scene of learned feeding and drinking behaviors (Fig. 8).  
501 Top-down scene signals might set vTT in a scene-specific working mode for olfactory  
502 sensory processing. As the scenes develop toward the goal (eating or drinking) during  
503 the feeding behavior, the top-down signals may instruct moment by moment switching  
504 of active vTT cell subpopulations in accord with the current and predicted future scenes.  
505 To examine these possibilities in more detail, it is necessary to record afferent synaptic  
506 inputs and top-down synaptic inputs using in vivo whole cell patch recordings or to  
507 optogenetically manipulate these inputs individually (Land et al., 2014).

508

### 509 **vTT cells also represent future scenes the mouse predicts**

510 In the odor-guided eating or no-eating task, many eating scene cells began to increase  
511 their firing rate before the mouse start to eat the food. This observation raised the  
512 possibility that the increase in firing rate of eating scene cells during the pre-eating  
513 scene was not due to the sensory inputs generated by eating but might be due to the  
514 prediction of eating based on the sensory inputs from the cue odor. Furthermore, many  
515 instrumental scene cells suddenly increased their firing rate before the food was  
516 deprived (Fig. 2b bottom), indicating that the firing rate increase during the  
517 pre-deprivation period was not caused by actual food deprivation. We speculate that the  
518 mouse noticed the experimenter's hand coming closer to the food dish and predicted  
519 that the food dish will be deprived soon (Fig. 2b bottom) and this prediction of danger  
520 caused the vTT instrumental scene cells to rapidly increase the firing rate. Based on

521 these observations we hypothesize that not only the present scene the mouse encounters  
522 but also future scene the mouse predicts influence firing activity of vTT cells.

523 In the odor-guided Go/No-go tasks, many odor checking scene cells showed increased  
524 discharges that lasted up to the end of the odor cessation period after the mouse sniffed  
525 go cue odor which presumably induced the prediction of water reward. In contrast, after  
526 sniffing no-go cue odor which presumably did not induce the reward prediction, these  
527 cells showed increased discharges only briefly during the odor presentation period and  
528 diminished discharges during the odor cessation period (Fig. 6b). These results  
529 corroborate the idea that activity of odor checking scene cells are modulated not only by  
530 the signals of present scene that the mouse encounters but also by the future scene that  
531 the mouse predicts. We speculate that the reward predicting scene activity of the vTT  
532 scene cells is not driven directly by the olfactory sensory afferent input but may be  
533 induced by top-down inputs from higher areas because the reward predicting scene  
534 activity was induced regardless of the odorants used as go-cue. We speculate that the  
535 continued high frequency firing of odor checking scene cells during the odor cessation  
536 period reflects top-down scene-predicting signals reflecting the continued attention to  
537 the predicted reward scene or working memory of the predicted reward generated in the  
538 higher brain regions such as medial prefrontal cortex.

539 Interestingly, higher firing rate during the odor cessation period after go-odor  
540 stimulation compared with the firing rate during the same period after no-go odor  
541 stimulation was observed not only in odor checking scene cells, but also in a subset of  
542 approaching and moving scene cells, waiting scene cells, and drinking scene cells (Fig.  
543 6c). These results suggest that the presumptive top-down reward-predicting scene  
544 signals during the odor checking scene occur not only in odor checking scene cells but  
545 also in a small subset of scene cells that are in charge of subsequent series of scenes  
546 including the goal scene. We speculate that some scene cells may receive top-down  
547 scene-predicting signals when the mouse is predicting the scene before the start of the  
548 scene.

549 Similar pre-scene activity was reported in the hypothalamic Agouti-related-peptide  
550 (AgRP) neurons, which are interoceptive neurons receiving energy balance-related  
551 hormone signals and are known to drive feeding behaviors. It has been reported that the  
552 rapid decrease in AgRP neuron firing occurs at the timing when mice detect  
553 food-associated cues, prior to actual ingestion of food (Mandelblat-Cerf et al., 2015).

554

555

556 **vTT scene cells have implications on neuronal mechanisms of top-down attention**



557 **and odor-scene association memory**

558 Present study does not address the question whether the scene-specific increase in  
559 firing rate of vTT cells is induced by top-down inputs from prefrontal cortex and higher  
560 areas of olfactory cortex or by bottom-up olfactory sensory inputs. If the scene-selective  
561 activity of vTT cells is mediated mainly by top-down signals, the scene cell activity  
562 may reflect top-down attention signals. Higher centers might send top-down signals to  
563 facilitate activity of attended scene cells in the vTT and thus to facilitate attended scene  
564 cells' response to odor stimuli. It is also possible that higher centers might send  
565 top-down signals to suppress activity of un-attended scene cells to suppress un-attended  
566 scene cells' response to distractor odor stimuli. Further works with selective inhibition  
567 of top-down input or olfactory sensory input are necessary to examine the functional  
568 role of the vTT scene cells in odor-guided feeding and drinking behaviors.

569 The presumptive scene-specific coincidence detection by vTT pyramidal cells may  
570 induce burst spike discharges, resulting in the strengthening and weakening of synaptic  
571 connectivity between incoming synapses (both bottom-up and top-down) and vTT  
572 pyramidal cells, among vTT pyramidal cells via recurrent axon collaterals, and between  
573 vTT cells and their target neurons. If specific scene cells are in charge of odor signal  
574 processing during a particular scene, the synaptic plasticity occurs in the circuit of these  
575 scene cells. Since a majority of vTT cells are scene cells, the synaptic plasticity of vTT  
576 cells responsible for odor memory may occur in scene-specific manner.

577 Attentional modulation also occurs in human olfactory cortex (Zerano, C et al., 2004).  
578 However, it is not known at present whether neurons in human olfactory cortex have  
579 mechanisms for scene effect on olfactory sensory processing similar to that found in  
580 vTT neurons of the mouse olfactory cortex. Human sensory evaluation studies suggest  
581 that odor signals from a same food might be processed differently at different scenes of  
582 eating and drinking behaviors. For example, our perception of orthonasal odor from  
583 wine during pre-drinking aroma-check scene differs strikingly from the perception of  
584 retronasal odor from the same wine during the aroma-burst scene just after the  
585 swallowing (Shepherd, 2017). The memory of the orthonasal odor of wine differs also  
586 from that of retronasal odor of the same wine. Future experiments might reveal evidence  
587 for scene-dependent odor processing and odor memory in the human brain, which may  
588 be essential for performing and enjoying eating and drinking behaviors at daily meals.

589

590

591 **Materials and Methods**

592

593 **Animals.** All experiments were performed on male C57BL/6NCrSlc mice (9 weeks  
594 old; weighing 20–25 g) purchased from Shimizu Laboratory Supplies Co., LTD., Kyoto,  
595 Japan. The mice were individually housed in a temperature-controlled environment with  
596 a 13-h light and 11-h dark cycle (lights on at 8:00 and off at 21:00). Food and water  
597 were available *ad libitum* until behavioral task started. All experiments were performed  
598 in accordance with the guidelines for animal experiments at Doshisha University with  
599 the approval of the Animal Research Committee of Doshisha University.

600

601 **Behavioral task.** For the odor-guided eating or no-eating task (Fig. 1a), mice (n = 6)  
602 were placed on a food restriction schedule with daily body weight monitoring to ensure  
603 that body mass remained within 80% of prior mass before restriction. In the training  
604 session, mice were required to associate odors with sugar (sucrose) rewards. The  
605 training was conducted in a plastic cage (38.5 x 33.5 x 18 cm, CLEA Japan Inc., Tokyo,  
606 Japan) covered with virgin pulp bedding (SLC, Inc., Shizuoka, Japan) and recording  
607 camera in easy soundproof room with a ventilator fan providing air circulation and low  
608 level background noise. Mice were presented sugar on a holed Petri dish which  
609 contained a filter paper (2×2 cm) soaked with one of odors (40 µl) covered with the  
610 bedding at an arbitrary position in the cage. Cue odors were eugenol (TOKYO  
611 CHEMICAL INDUSTRY Co., LTD., Tokyo, Japan), vanilla essence (NARIZUKA  
612 Corporation, Tokyo, Japan). After the learning of association between dish with odor  
613 and sugar reward, mice approached and touched the dish, dug the bedding and showed  
614 sugar eating behavior.

615 One day after the initial training, mice were trained to associate almond odor (almond  
616 essence, NARIZUKA Corporation) with aversive consequence (malaise) as follows  
617 (Raineke et al., 2009). After the mouse approached the dish with almond odor and ate  
618 the sugar on the dish, mice received intraperitoneal injection of 0.5M lithium chloride  
619 (LiCl, 0.01 ml/g). After the experience of LiCl injection, mice approached the dish with  
620 almond odor but left the dish without eating sugar (no-eating response).

621 After these trainings, we examined the mice to perform odor-guided eating or  
622 no-eating task. We randomly presented sugar on the dish with one of three different cue  
623 odors (eugenol, vanilla essence, or almond essence). Almond odor was presented in  
624 20% probability. We presented also powder chow on the dish in trials that were  
625 randomly inserted among the above trials. At the timing about 6.0 sec after the mice  
626 started to eat, we suddenly deprived the dish. Mice performed a session of behavioral

627 tasks consisting of 40-60 trials in a day.

628 For the odor-guided Go/No-go task (Fig. 4a), we used a behavioral apparatus that was  
629 controlled by Bpod State Machine r0.5 (Sanworks LLC, NY, USA), which are open  
630 source control devices designed for behavioral tasks. Our system comprises a  
631 custom-designed mouse behavior box (Sanworks) with two nose-poke ports on the front  
632 wall in a soundproof box (BrainScience • Idea. Co., Ltd., Osaka, Japan) with a ventilator  
633 fan providing air circulation and low level background noise. Each of the two nose-pork  
634 ports had white light-emitting diode (LED) and infrared photodiodes. Interruption of the  
635 infrared beam generated a Transistor-Transistor-Logic (TTL) pulse signaling the entry  
636 of the mouse head into the port. Odor deliver port had a stainless steel tubing connected  
637 to a custom-made olfactometer (Uchida and Mainen, 2003). Eugenol (TOKYO  
638 CHEMICAL INDUSTRY Co., LTD., Tokyo, Japan) was used as a go cue odor, while  
639 and amyl acetate (TOKYO CHEMICAL INDUSTRY Co., LTD.) was used as a no-go  
640 cue odor. These odors were diluted to 10% in mineral oil and further diluted 1:10 by  
641 airflow. Water reward delivery was based on gravitational flow controlled by a solenoid  
642 valve (The Lee Company, CT, USA) connected via tygon tubing to a stainless steel  
643 tubing. The reward amount (6  $\mu$ l) was determined by opening duration of the solenoid  
644 valve and regularly calibrated.

645 For the Go/No-go task, mice ( $n = 6$ ) were placed on a water restriction schedule with  
646 daily body weight monitoring to ensure that body mass remained within 80% of prior  
647 mass before restriction. Each trial began by the illumination of LED light at the right  
648 odor port that instructed the mice to nose poke into the odor port. A nose poke in the  
649 odor port resulted in delivery of one of the two cue odors for 500 msec. Mice were  
650 required to sniff the odor and then keep nose poking for 500 msec after the cessation of  
651 odor stimulation. Five hundred msec after the cessation of odor stimulation, the LED  
652 light was turned off and the mice could withdraw its nose from the odor port. If eugenol  
653 odor (go cue odor) was presented, mice were required to move to and nose poke into the  
654 left water reward port within 2 sec. At the water port, mice were required to keep nose  
655 poking for 300 msec before water delivery began. Then water reward was delivered in 6  
656  $\mu$ l. If amyl acetate odor (no-go cue odor) was presented, mice were required to restrict  
657 entering the water port for 2 sec.

658

659 **Electrophysiology.** Adult male mice were anesthetized with medetomidine (0.75 mg/kg  
660 ip), midazolam (4.0 mg/kg ip) and butorphanol (5.0 mg/kg ip) and implanted with a  
661 custom-built microdrive of three or four tetrode in the vTT (2.6 mm anterior to the  
662 bregma, 0.4 mm lateral to the midline, 4.0 mm from the brain surface). Individual

663 tetrodes consisted of four twisted polyimide-coated tungsten wires (California Fine  
664 Wire, single wire diameter 12.5  $\mu\text{m}$ , gold plated to less than 500 K $\Omega$ ). Two other screws  
665 were threaded into the bone above the cerebellum for reference. These electrodes were  
666 connected with an electrode interface board (EIB-18, Neuralynx) on the microdrive.  
667 The microdrive array was fixed to the skull with LOCTITE 454 (Henkel Corporation,  
668 Düsseldorf, Germany). After completion of surgery, mice received atipamezole (0.75  
669 mg/kg ip) to reverse the effect of medetomidine and permit a reduction of recovery  
670 period. Mice also received analgesics (ketprofen, 5mg/kg, ip). Behavioral training  
671 resumed at least 1 week after the surgery.

672 Electrical signals were obtained with either a Cheetah recording system (Neuralynx) or  
673 the open-source hardware (Open Ephys). For unit recordings, the signals were sampled  
674 at 32 kHz in NeuraLynx and at 30 kHz in Open Ephys and band-pass filtered at 600–  
675 6,000 Hz. After each recording, tetrodes were adjusted to obtain new units.

676

677 **Data analysis.** All data analysis was carried out using built-in and custom-built  
678 software in MATLAB 2018a (The Mathworks, Inc., MA, USA).

679 Task accuracy: In odor-guided eating or no-eating task, accuracy rate was calculate as  
680 the average of the percentage that the mouse successfully ate the sucrose in the dish  
681 with eugenol or vanilla odor, the percentage that the mouse successfully ate powder  
682 chow and the percentage that the mouse didn't eat the sugar in the dish with almond  
683 odor. Mice performed 40-60 trials in each session per day. Each block consisted of 5  
684 trials. In odor-guided Go/No-go task, accuracy rate was calculated as the sum of the  
685 percentage of success rate in the go trials and the percentage of success rate in no-go  
686 trials in a session. Mice performed up to 600 trials in each session per day. Each block  
687 consisted of 20 trials.

688 Spike sorting: Spikes were sorted into clusters offline on the basis of the waveform  
689 energy, peak amplitude and principal component1 from the four tetrode channels by  
690 means of an automated spike-separation algorithm KlustaKwik (Kenth Harris). The  
691 resulting classification was corrected and refined manually with MClust software (A. D.  
692 Redish). Cluster quality was quantified by isolation distance. Clusters with isolation  
693 distance under 20 were excluded from analysis.

694 Spike train analysis: In odor-guided eating or no-eating task, we acquired the  
695 timestamps of each event (the start of approaching to the dish, touching the dish, and  
696 deprivation of the dish) from frames of recorded movie and they were synchronized  
697 with spike data. In the odor-guided Go/No-go task, neural and behavioral data were  
698 synchronized by inputting the each event timestamps from the Bpod behavioral control

699 system in the electric signal recordings system. To calculate firing rates during tasks,  
700 peri-event time histograms (PETHs) were calculated using 10ms bin width and  
701 smoothed by convolving spike trains with a 20-msec wide Gaussian filter (Figs 1d, 2d,  
702 5c, 6b). The firing rate difference between late approaching scene and early eating scene  
703 in the odor-guided Go/No-go task was verified by the paired t-test.

704 To examine the relation of firing rate change of individual vTT cells to the  
705 development of behavioral scenes in the behavioral tasks, we calculated PETH during  
706 tasks. Because scene durations were different in different trials in the odor-guided eating  
707 or no-eating task, we standardized each scene time in each trial to average scene time.  
708 We calculated PETH using 50 msec bin width and smoothed by convolving spike trains  
709 with a 100 msec wide Gaussian filter. To avoid influence of the firing rate differences,  
710 PETHs value were divided by peak firing rate of each cell (maximum value of the  
711 PETH). Principal component analysis (PCA) was calculated by the singular value  
712 decomposition of the normalized PSTHs. Hierarchical clustering was done using the  
713 first three PCs of the normalized PSTHs using a Euclidean distance metric and average  
714 agglomeration method.

715 To determine whether a cluster showed a significant scene-specific activity, we used  
716 one-way ANOVA with Tukey's *post hoc* test on a cell-by-cell firing rates in the cluster  
717 during the each scene. The area under the receiver operating characteristic (auROC)  
718 curves was calculated by comparing the distribution firing rate of each scene across go  
719 trials in 50 msec bins to the distribution firing rate across no-go trials. All data are  
720 presented as mean  $\pm$  SEM.

721

722 **Histology.** After recording, mice were deeply anesthetized by intraperitoneal injection  
723 of sodium pentobarbital. Electric lesions were made using 10-20  $\mu$ A direct current for 5  
724 s to through one of the four leads of tetrode. Mice were perfused transcardially with  
725 phosphate-buffered saline (PBS) followed by 4% paraformaldehyde (PFA). Brains were  
726 removed from the skull and post-fixed in PFA. The brains were cut in 50  $\mu$ m coronal  
727 sections, and stained with cresyl violet. The position of electrode tracks was determined  
728 in reference to the atlas of Paxinos and Watson (2001).

729

730 **In situ hybridization.** DIG labeled RNA probes for VGluT1 and GAD65/67 were made  
731 using the in vitro transcription kit (Roche) according to the manufacturer's protocol  
732 with plasmids kindly provided by Drs. Katsuhiko Ono and Yuchio Yanagawa (Asada, H.  
733 et al.,1997; Makinae, K. et al.,2000; Ono, K. et al. ,2008). Brain sections were made  
734 with a thickness of 20  $\mu$ m, mounted on slide glasses (Matsunami, CREST) using a paint

735 brush, dried overnight in a vacuum desiccator. The dried sections were fixed in 4% PFA,  
736 digested with Proteinase K (10 µg/mL) for 30 min, and post-fixed in 4% PFA. After  
737 prehybridization, the sections were incubated overnight at 65°C with DIG-labeled RNA  
738 probes. After stringent washing, the sections were blocked with 1% blocking reagent  
739 (11096176001, Roche) in TNT for 1 h. Subsequently, the sections were incubated  
740 overnight at 4°C with alkaline phosphatase-conjugated anti-DIG antibody (1:1,000;  
741 Roche). The sections were washed three times in TNT and once in TS 8.0 (0.1 M  
742 Tris-HCl, pH 8.0, 0.1 M NaCl, 50 mM MgCl<sub>2</sub>), and then alkaline phosphatase activity  
743 was detected using an HNPP fluorescence detection set (11758888001, Roche)  
744 according to the manufacturer's instructions. Incubation for this substrate was carried  
745 out for 30 min, repeated a total of 3 times, and stopped by washing in PBS. The  
746 Sections were counterstained with NeuroTrace Green (Thermo Fisher Scientific) and  
747 mounted in PermaFluor (Thermo Fisher Scientific).

748

749 **Retrograde tracing.** Adult male mice were anesthetized with medetomidine (0.75  
750 mg/kg ip), midazolam (4.0 mg/kg ip) and butorphanol (5.0 mg/kg ip), and then placed  
751 in a stereotaxic apparatus (Narishige, SR-5M). Injections were conducted with a syringe  
752 pump (WPI, UltraMicroPump III) connected to a Hamilton syringe (Hamilton,  
753 RN-1701) and mounted glass micropipette with a tip diameter of 50 µm connected by  
754 an adaptor (Hamilton, 55750-01).

755 We unilaterally or bilaterally injected 300 nl of CTB conjugated Alexa 555 (Thermo  
756 Fisher) at 100 nl/min in mPFC (A/P, 2.4 mm; M/L 0.4 mm from bregma; D/V, 1.0 mm  
757 from brain surface), OB (A/P, 4.3 mm; M/L 0.8 mm from bregma; D/V, 1.5 mm from  
758 brain surface), AON (A/P, 2.8 mm; M/L 1.3 mm from bregma; D/V, 2.6 mm from brain  
759 surface), OT (A/P, 1.5 mm; M/L 1.0 mm from bregma; D/V, 4.7 mm from brain surface),  
760 APC (A/P, 2.3 mm; M/L 1.8 mm from bregma; D/V, 3.4 mm from brain surface), and  
761 PPC (A/P, -1.5 mm; M/L 3.6 mm from bregma; D/V, 4.5 mm from brain surface) or 250  
762 nl in vTT (A/P, 0.3 mm tilted 30°; M/L 0.4 mm from bregma; D/V, 4.6 mm from brain  
763 surface). After the surgery, mice received atipamezole (0.75 mg/kg ip) and ketprofen  
764 (5mg/kg, ip). One week later, the mice were deeply anesthetized and perfused with  
765 saline and then 4% paraformaldehyde under anesthesia. Brains were cut in 50 µm  
766 coronal sections.

767

768 **Microscopy.** Sections were examined with a confocal laser microscope (Olympus,  
769 FV1200), and a bright-field and fluorescent microscope (Zeiss).

770

771

772 **References**

- 773 Asada, H, Kawamura, Y, Maruyama, K, Kume, H, Ding, RG, Kanbara, N, Kuzume, H,  
774 Sanbo, N, Yagi, T and Obata, K (1997) Cleft palate and decreased brain  
775 gamma-aminobutyric acid in mice lacking the 67-kDa isoform of glutamic acid  
776 decarboxylase. *Proc Natl Acad Sci U S A* 94, 6496-6499.  
777
- 778 Brunjes, PC, Kay, RB and Arrivillaga, JP (2011) The mouse olfactory peduncle. *J.*  
779 *Comp. Neurol.* 519 (14): 2870-2886.  
780
- 781 Buck L, and Axel, R (1991) A novel multigene family may encode odorant receptors:  
782 a molecular basis for odor recognition. *Cell* 65:175-187.  
783
- 784 Bushman, TJ, and Miller, EK (2014) Goal-direction and top-down control. *Phil. Trans.*  
785 *R. Soc. B* 369: 20130471.  
786
- 787 Carlson, KS, Gadziola, ES, Dauster, ES, and Wesson, DW (2018) Selective attention  
788 controls olfactory decisions and the neural encoding of odors. *Current Biology* 28: 1-11.  
789
- 790 Choi, GB, Stettler, DD, Kallman, BR, Bhasker, ST, Fleischmann, A and Axel, R (2011)  
791 Driving opposing behaviors with ensembles of piriform neurons. *Cell* 146,  
792 1004-1015.  
793
- 794 Friedman, B, and Price, JL (1983) Fiber systems in the olfactory bulb and cortex: a  
795 study in adult and developing rats, using the Timm method with the light and electron  
796 microscope. *J. Comp Neurol.* 223(1): 88-109.  
797
- 798 Gadziola, MA and Wesson, DW (2016) The neural representation of goal-directed  
799 actions and outcomes in the ventral striatum's olfactory tubercle. *J. Neurosci.* 36(2):  
800 548-560  
801
- 802 Gilbert, CD and Sigmen, M (2007) Brain states: top-down influences in sensory  
803 processing. *Neuron*, 54: 677-696.  
804
- 805 Haberly, LB and Price, JL (1978) Association and commissural fiber systems of the  
806 olfactory cortex of the rat II, systems originating in the olfactory peduncle. *J Comp*  
807 *Neurol.* 181:781-808.

808

809 Hill, DN, Varga, Z, Jia H, Sakmann, B and Konnerth, A (2013) Multibranch activity in  
810 basal and tuft dendrites during firing of layer 5 cortical neurons in vivo. *Proc Natl Acad*  
811 *Sci USA* 110 (33): 13618-13623.

812

813 Hoover, WB and Vertes, RP (2011) Projections of the medial orbital and ventral  
814 orbital cortex in the rat. *J. Comp. Neurol.* 519(18): 3766-3801.

815

816 Igarashi, K, Ieki, N, An, M, Yamaguchi, Y, Nagayama, S, Kobayakawa, K, Kobayakawa,  
817 R, Tanifuji, M, Sakano, H, Chen, W and Mori, K (2012) Parallel mitral and tufted cell  
818 pathways route distinct odor information to different targets in the olfactory cortex. *J.*  
819 *Neurosci.* 32(23):7970-7985.

820

821 Land, BB, Narayanan NS, Liu, RJ, Gianessi, CA, Brayton, CE, Grimaldi, DM, Sarhan,  
822 M, Guarnieri, DJ, Deisseroth K, Aghajanian, GK and DiLeon RJ (2014) *Nat Neurosci*  
823 17(2): 248-253

824

825 Larkum, ME, Zhu, JJ and Sakmann, B (1999) A new cellular mechanism for coupling  
826 inputs arriving at different cortical layers. *Nature* 398, 338-341.

827

828 Luskin, MB and Price, JL (1983a) The topographic organization of association fibers  
829 of the olfactory system in the rat, including centrifugal fibers to the olfactory bub. *J.*  
830 *Comp. Neurol.* 216(3): 264-291.

831

832 Luskin, MB and Price, JL (1983b) The laminar distribution of intracortical fibers  
833 originating in the olfactory cortex of the rat *J. Comp. Neurol.* 216(3): 292-302.

834

835 Makinae, K, Kobayashi, T, Kobayashi, T, Shinkawa, H, Sakagami, H, Kondo, H,  
836 Tashiro, F, Miyazaki, J, Obata, K, Tamura, S and Yanagawa, Y (2000) Structure of the  
837 mouse glutamate decarboxylase 65 gene and its promoter: preferential expression of its  
838 promoter in the GABAergic neurons of transgenic mice. *J Neurochem* 75, 1429-1437.

839

840 Mandelblat-Cerf, M, Ramesh, RN, Burgess, CR, Pattella, P, Yang, Z, Lowell, BB, a  
841 Andermann, ML (2015) Arcuate hypothalamic AgRP and putative POMC neurons  
842 show opposite changes in spiking across multiple timescales. *eLife* 4: e07122 DOI:  
843 10.7554/eLife.07122.



844

845 Mori, K and Sakano, H (2011) How is the olfactory map formed and interpreted in the  
846 mammalian brain? *Annu Rev Neurosci.* 34: 467-99.

847

848 Mori, K, Manabe, H, Narikiyo, K, and Onisawa, N (2013) Olfactory consciousness  
849 and gamma oscillation couplings across the olfactory bulb, olfactory cortex and  
850 orbitofrontal cortex. *Frontiers in Psychology*, 4:747

851

852 Murata, K, Kanno, M, Ieki, N, Mori, K and Yamaguchi, M (2015) Mapping of learned  
853 odor-induced motivated behaviors in the mouse olfactory tubercle. *J. Neurosci.*  
854 35(29): 10581-10599.

855

856 Nagayama, S, Enerva, A, Fletcher, ML, Masurkar, AV, Igarashi, K, Mori, K and Chen,  
857 WR (2010) Differential axonal projection of mitral and tufted cells in the mouse main  
858 olfactory system. *Frontiers in Neural Circuits*, 4: 1-8.

859

860 Neville, KR and Haberly, LB (2004) Olfactory Cortex, in Shepherd GM (Ed.) *The*  
861 *synaptic organization of the brain.* Fifth edition, pp415-454, Oxford Univ. Press

862

863 O'Keefe, J (2007) Hippocampal neurophysiology in the behaving animal, in Andersen,  
864 P et al. (Eds) *The Hippocampus Book*, pp475-548, Oxford Univ. Press

865

866 Ono, K, Takebayashi, H, Ikeda, K, Furusho, M, Nishizawa, T, Watanabe, K and Ikenaka,  
867 K (2008) Regional- and temporal-dependent changes in the differentiation of Olig2  
868 progenitors in the forebrain, and the impact on astrocyte development in the dorsal  
869 pallium. *Dev Biol* 320, 456-468.

870

871 Paxinos, G and Watson, KB (2001) *The mouse brain in stereotaxic coordinates.* 2<sup>nd</sup> ed.  
872 Academic press, London.

873

874 Rainecki, C, Shionoya, K, Sander, K and Sullivan, RM (2009) Ontogeny of odor-LiCl  
875 vs. odor-shock learning: similar behaviors but divergent ages of functional amygdala  
876 emergence. *Learn Mem.* 16(2):114-121.

877

878 Roelfsema, PR and deLange, FP (2016) Early visual cortex as a multiscale cognitive  
879 blackboard. *Annu Rev Vis Sci.* 2: 131-151.

880

881 Sakmann, B (2017) From single cells and single columns to cortical networks:  
882 dendritic excitability, coincidence detection and synaptic transmission in brain slices  
883 and brains Exp. Physiol. 102.5 pp489-521.

884

885 Sharpe, MJ and Schoenbaum, G (2016) Back to basics: making predictions in the  
886 orbitofrontal-amygdala circuit. Neurobiol. Learn Mem. 131: 201-206.

887

888 Shepherd, GM (2017) Neuroenology. Columbia University Press.

889

890 Stuart, GJ and Spruston, N (2015) Dendritic integration: 60 years of progress. Nat  
891 Neurosci 18(12): 1713-1721.

892

893 Uchida, N and Mainen, ZF (2003) Speed and accuracy of olfactory discrimination in the  
894 rat. Nat Neurosci, 6(11): 1224-1229.

895

896 Wilson, D and Sullivan, RM (2011) Cortical processing of odor objects. Neuron, 72:  
897 506-519.

898

899 Zerano, C, Bensafi, M, Porter J, Mainland J, Jhonson B, Bremner E, Telles C, Khan R,  
900 and Sobel N (2005) Attentional modulation in human primary olfactory cortex. Nat  
901 Neurosci 8(1): 114-120.

902

903

904

905

906 **Figure legends**

907

908 Figure 1: Firing pattern of vTT neurons during odor-guided eating or no-eating task  
909 and food deprivation

910 (a) Scene development during odor (eugenol, vanilla essence, powder chow)-guided  
911 eating task (upper illustration) and odor (almond oil)-guided no-eating task (lower  
912 illustration). Black arrow indicates time axis. Scenes develop with time from left to  
913 right.

914 (b) Behavioral accuracy of the odor-guided eating or no-eating task (5 trials / block, n =  
915 6 mice).

916 (c) Top: Histological identification of recording sites. Nissl stained section of the  
917 olfactory peduncle. An arrow indicates electric lesion of recording site in the vTT. Scale  
918 bar, 500  $\mu$ m. Bottom: Recording tracks in the vTT. Pink area shows vTT. Vertical  
919 thick lines indicate recording tracks. APC, anterior piriform cortex; AON, anterior  
920 olfactory nucleus.

921 (d) Firing pattern of an eating scene cell during the odor-guided eating or no-eating task.  
922 Raster plots and peri-event time histogram (PETH) were aligned at the time when the  
923 mouse arrived at the dish (vertical dashed line at 0 in the left PETH) or at the time when  
924 the food was deprived (vertical dashed line at 0 in the right PETH). A, almond oil odor  
925 and no-eating (blue); E, eugenol odor and eating (red); V, vanilla essence odor and  
926 eating (pink); P, powder chow odor and eating (yellow).

927 (e) Firing pattern of an instrumental scene cell. Raster plots aligned at the arrival (left  
928 PETH) and food deprivation (right PETH).

929

930

931 Figure 2: Pattern of firing rate change of vTT neurons along the time course of scene  
932 development

933 (a) Classification of a majority of vTT neurons into eating scene cells and instrumental  
934 scene cells based on principal component analysis (PCA) of their firing patterns. Left:  
935 Change in normalized firing rate along the time course of approaching scene (dark-blue  
936 bar), eating scene (orange bar) and deprivation scene (purple bar) during the go trials of  
937 odor-guided eating task. Each row represents one cell (cell #1 – cell #391). Time 0  
938 indicates the start of approaching behavior toward the dish. The firing rate changes were  
939 aligned with the timing of start of approaching behavior (at 0 sec), arrival at the dish (at  
940 3.5 sec) and the onset of food deprivation (at 6.5 sec). Duration of approaching scene

941 (from the onset of approaching behavior to the arrival at the dish) varied among  
942 different trials but is normalized in this graph to 0 - 3.5 sec. Duration of eating scene  
943 (from the start of eating to the onset of food deprivation) varied among different trials  
944 but is normalized to 3.5 - 6.5 sec. Arrows indicate representative cells showing in (d).  
945 a.u.: arbitrary unit of average normalized firing rate (0: minimal; 1: maximal) Right:  
946 Each row shows the first three principal components (1, 2, and 3) of the firing pattern of  
947 individual vTT cell. These values were used for the unsupervised hierarchical clustering,  
948 as shown in the right dendrogram. Two main clusters are shown by light-blue and red.  
949 (b) Left: Time course of the change in average normalized firing rate of cells in eating  
950 scene cell cluster (top) and that of cells in instrumental scene cell cluster (bottom)  
951 during the scene development. Right: Comparison of the average normalized firing  
952 rate of eating scene cell cluster (top) and instrumental scene cell cluster during the  
953 approach scene (left), eating scene (center) and deprivation scene (right). For all box  
954 plots, the central mark is the median, the top and bottom edges of the box are the 75th  
955 and 25th percentiles, and the whiskers are drawn to the furthest observations. (Top,  $F(2,$   
956  $633) = 368.57$ ; bottom,  $F(2, 534) = 78.92$ , one-way ANOVA followed by post hoc  
957 Tukey test, \*\*\*,  $P < 0.01$ ). A, approaching scene; E, eating scene; D, deprivation scene.  
958 (c) Change in the normalized firing rate along the time course of approaching scene  
959 (dark-blue bar) and no-eating scene (green bar) during the almond odor-guided  
960 no-eating task. Cells (#1 - #391) are the same cells that are shown in (a), and the order  
961 of neurons in the row is same as in (a). Arrows indicate representative cells showing in  
962 (d).  
963 (d) Firing pattern of a representative eating scene cell (top) and a representative  
964 instrumental scene cell (bottom) during the odor-guided eating task (blue line) and the  
965 no-eating task (red line).  
966 (e) Comparison of the average firing rate of late approaching scene (from 1.5 to 3.5 sec)  
967 and early eating scene (from 3.5 to 5.5 sec) during eating task (left) and no-eating task  
968 (right) in an eating scene cell (top) and an instrumental scene cell (bottom). A, late  
969 approaching scene; eE, early eating scene, \*\*\*,  $P < 0.01$ , unpaired t-test.

970

971

972 Figure 3: Alignment of vTT cells (#1 - #391) by the timing of maximal firing as a  
973 function of scene development during the odor-guided eating task. Top: dark-blue bar,  
974 approaching scene; orange bar, eating scene; purple bar, deprivation scene.

975

976

977 Figure 4: Odor-guided Go/No-go task to obtain water reward.

978 (a-1) (Go Trial) Scene development during odor-guided go task. Eugenol odor was used  
979 as a cue for the go and drink task. Sequence of scenes invariably observed in this task  
980 was approaching scene, odor checking scene, moving scene, reward waiting scene, and  
981 drinking scene. Thick black arrow indicates time axis. Scenes develop with time from  
982 left to right. WP, water port; OP, odor port. Orange tube in the OP indicates an odor  
983 delivery tube. Orange arrow indicates eugenol odor delivery. Blue tube in the WP  
984 indicates a water delivery tube, and blue droplet in the drinking scene indicates water  
985 delivery.

986 (a-2) (No-go Trial) Scene development during the task of odor guided no-go and wait  
987 trial. Amyl acetate odor was used as a cue for no-go and wait task. Red arrow indicates  
988 amyl acetate odor delivery.

989 (b) Success rate of odor guided Go/No-go task (20 trials / block, n = 6 mice).

990 (c) Histological identification of recorded sites. Arrow indicates electric lesion of  
991 recording site in the vTT. Scale bar, 500  $\mu$ m. Thick lines indicate recording tracks in the  
992 vTT. Pink area shows vTT.

993

994

995 Figure 5: Firing pattern of vTT cells during odor-guided go trials.

996 (a) PCA-based classification of vTT cells into four scene-specific clusters and two other  
997 clusters. Left: Firing rate change along the time course of approaching scene (gray bar),  
998 odor checking scene (orange bar), moving scene (white bar), waiting scene (brown bar),  
999 and drinking scene (dark-blue bar) during the odor-guided go trials. Each row represents  
1000 one cell (cell #1 – cell #288). Time 0 indicates the timing of odor valve opening (start of  
1001 odor delivery). The firing rate changes were aligned with the timings of onset of odor  
1002 presentation (at 0 sec), withdrawal of nose from the odor port (at 1 sec), poking the  
1003 mouth into the reward port (at 1.5 sec) and onset of water reward presentation (at 1.8  
1004 sec). Durations of approaching scene and moving scene varied among different trials  
1005 but are normalized to -0.5 - 0 sec and 1 - 1.5 sec, respectively. Right: Each row  
1006 represents the first three principal components (PC) (1, 2, and 3) of the firing pattern of  
1007 an individual vTT cell. These values were used for the unsupervised hierarchical  
1008 clustering, as shown in the right dendrogram. Four scene-specific cell clusters are  
1009 shown in different colors (light blue, approaching and moving scene cell cluster; red,  
1010 odor checking scene cell cluster; dark green, waiting scene cell cluster; pink, drinking  
1011 scene cell cluster). Two unaccountable cell clusters are shown by yellow and light green.  
1012 Arrows indicate representative cells showing in (c).

1013 (b) Average firing pattern of the vTT scene cells during the task. Color in left bar  
1014 indicates the cell cluster shown by the same color in (a). Right: Comparison of the  
1015 averaged normalized firing rate of approaching and moving scene cell cluster (light  
1016 blue), odor checking scene cell cluster (red), waiting scene cell cluster (dark-green), and  
1017 drinking scene cell cluster (pink) during each scene. Other two cell clusters with  
1018 multi-scene activity are shown by yellow and light green. For all box plots, the central  
1019 mark is the median, the top and bottom edges of the box are the 75th and 25th  
1020 percentiles, and the whiskers are drawn to the furthest observations (approaching and  
1021 moving scene cell cluster,  $F(4,315)=103.23$ ; odor checking scene cell cluster,  
1022  $F(4,375)=120.92$ ; waiting scene cell cluster,  $F(4,60)=20.66$ ; drinking scene cell cluster,  
1023  $F(4,155)=91.85$ , one-way ANOVA followed by post hoc Tukey test; \*\*\*,  $P < 0.01$ ). A,  
1024 approaching scene; O, odor checking scene; M, moving scene; W, waiting scene; D,  
1025 drinking scene.

1026 (c) Firing pattern of a representative approaching- and moving-scene cell, an odor  
1027 checking scene cell, a waiting scene cell, and a drinking scene cell along the time course  
1028 of the go trials.

1029

1030 Figure 6: Moment-by-moment functional switching of vTT scene cells during the odor  
1031 guided go task and the odor guided no-go task.

1032 (a) Alignment of vTT scene cells by the timing of maximal firing as a function of scene  
1033 development during the odor guided go (left) or no-go (right) task. Each bar on the top  
1034 row shows an individual scene in the task. Gray bar, approaching scene; orange bar,  
1035 odor checking scene; white bar, moving scene; brown bar, waiting scene; dark-blue bar,  
1036 drinking scene. The odor checking scene was further subdivided into odor presentation  
1037 period (red bar) and odor cessation period (green bar).

1038 (b) Firing pattern of an odor checking scene cell between go trials (blue line) and no-go  
1039 trials (red line).

1040 (c) Histograms of auROC values of each scene cell during approach scene (gray), odor  
1041 presentation period (red), and odor cessation period (green) comparing between the go  
1042 trials and no-go trials. Columns at positive auROC values ( $> 0$ ) indicate cells that show  
1043 higher firing rate during go trials, whereas columns at negative values ( $< 0$ ) indicate  
1044 cells that show lower firing rate during go trials compared with that during no-go trials.  
1045 Cells with significant difference in auROC values are filled (t-test,  $p < 0.05$ ). A/M,  
1046 approaching and moving scene cells; O, odor checking scene cells; W, waiting scene  
1047 cells; D, drinking scene cells.

1048

1049 Figure 7: Cell types of vTT neurons and their connections with other areas  
1050 (a) *In situ* hybridization for *VGluT1* (upper panels) and *GAD65/67* (lower panels)  
1051 mRNAs with Neuro Trace staining of vTT cells. Scale bar, 100  $\mu$ m.  
1052 (b) Average percentages of *VGluT1* positive cells (left column) and *GAD65/67* positive  
1053 cells (right column) among the Neuro Trace positive cells in the vTT (n = 3 mice). Error  
1054 bar, S.E.M.  
1055 (c) Upper left: Coronal section of the vTT after injection of Alexa 555-conjugated  
1056 cholera toxin subunit B (CTB, red). Scale bar, 500  $\mu$ m. The other five panels show  
1057 CTB-labelled cells after CTB injection in the vTT. mPFC, medial prefrontal cortex; OB,  
1058 olfactory bulb; AON, anterior olfactory nucleus; APC, anterior piriform cortex; PPC,  
1059 posterior piriform cortex. Scale bar, 100  $\mu$ m  
1060 (d) Average density of CTB-labelled cell bodies in the each area (mPFC, n= 5 from 3  
1061 mice; OB, n = 5 from 3 mice; AON, n = 3 from 2 mice; APC, n = 5 from 3 mice; PPC, n  
1062 = 5 from 3 mice ). Error bar, S.E.M.  
1063 (e) CTB-labelled vTT cells after injection of CTB into the mPFC (upper left), OB  
1064 (upper middle), AON (upper right), olfactory tubercle (OT, lower left), APC (lower  
1065 middle) and PPC (lower right). Scale bar, 100  $\mu$ m.  
1066 (f) Average density of retrogradely-labelled CTB-positive cells in the vTT (mPFC, n = 3  
1067 from 2 mice; OB, n= 3 from 2 mice, AON, n = 3 from 2 mice; OT, n = 5 from 3 mice;  
1068 APC, n = 4 from 4 mice; PPC, n = 3 from 2 mice). Error bar, S.E.M.  
1069 (g) Schematic diagram of the connectivity pattern of vTT. Arrows show axonal  
1070 projection. Black arrows, presumptive afferent connections. Red arrows, presumptive  
1071 top-down connections.

1072

1073 Figure 8 Schematic diagram illustrating the hypothesis that individual vTT pyramidal  
1074 cells of the olfactory cortex are scene-dependent coincidence detectors, integrating  
1075 bottom-up olfactory sensory signals with top-down scene-selective signals.

1076 For simplicity, this diagram shows only three types of scene cells each with a  
1077 scene-selective top-down input. Orange shows the odor checking scene cell that  
1078 receives odor checking scene-selective top-down signal from higher cortical areas such  
1079 as medial prefrontal cortex. Brown shows the waiting scene cell that receives waiting  
1080 scene-selective top-down signal. Blue shows the drinking scene cell that receives  
1081 drinking scene-selective top-down signal. White cells represent other scene cells.  
1082 Olfactory sensory inputs include olfactory bulb afferent synapses terminating in layer Ia  
1083 (red) and association fiber synaptic inputs terminating in layer Ib (black) that are  
1084 originated from other areas of the olfactory cortex.

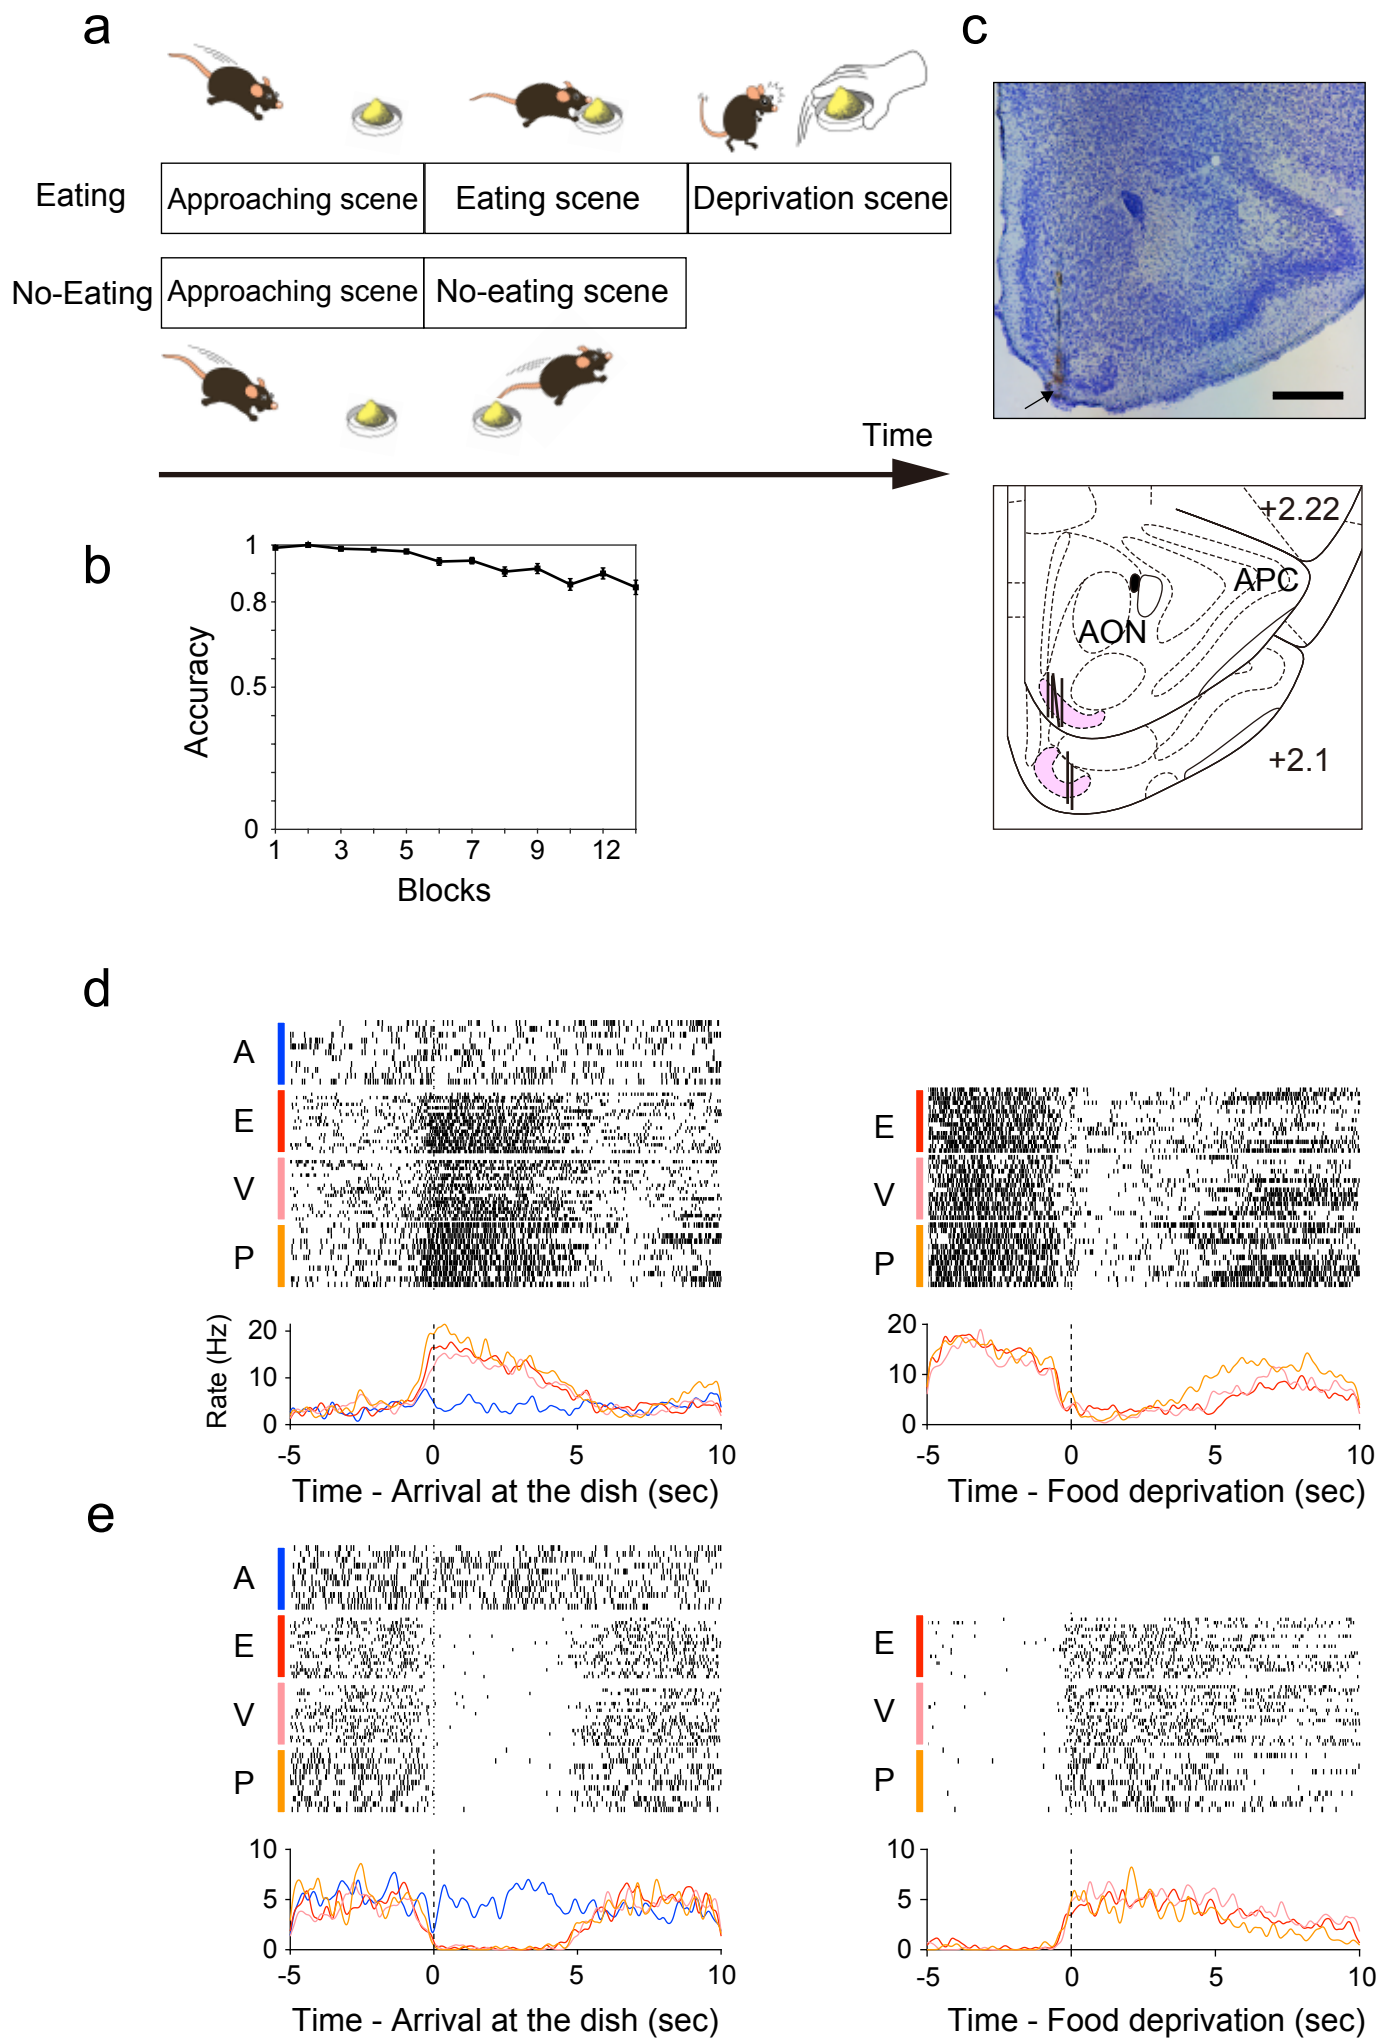



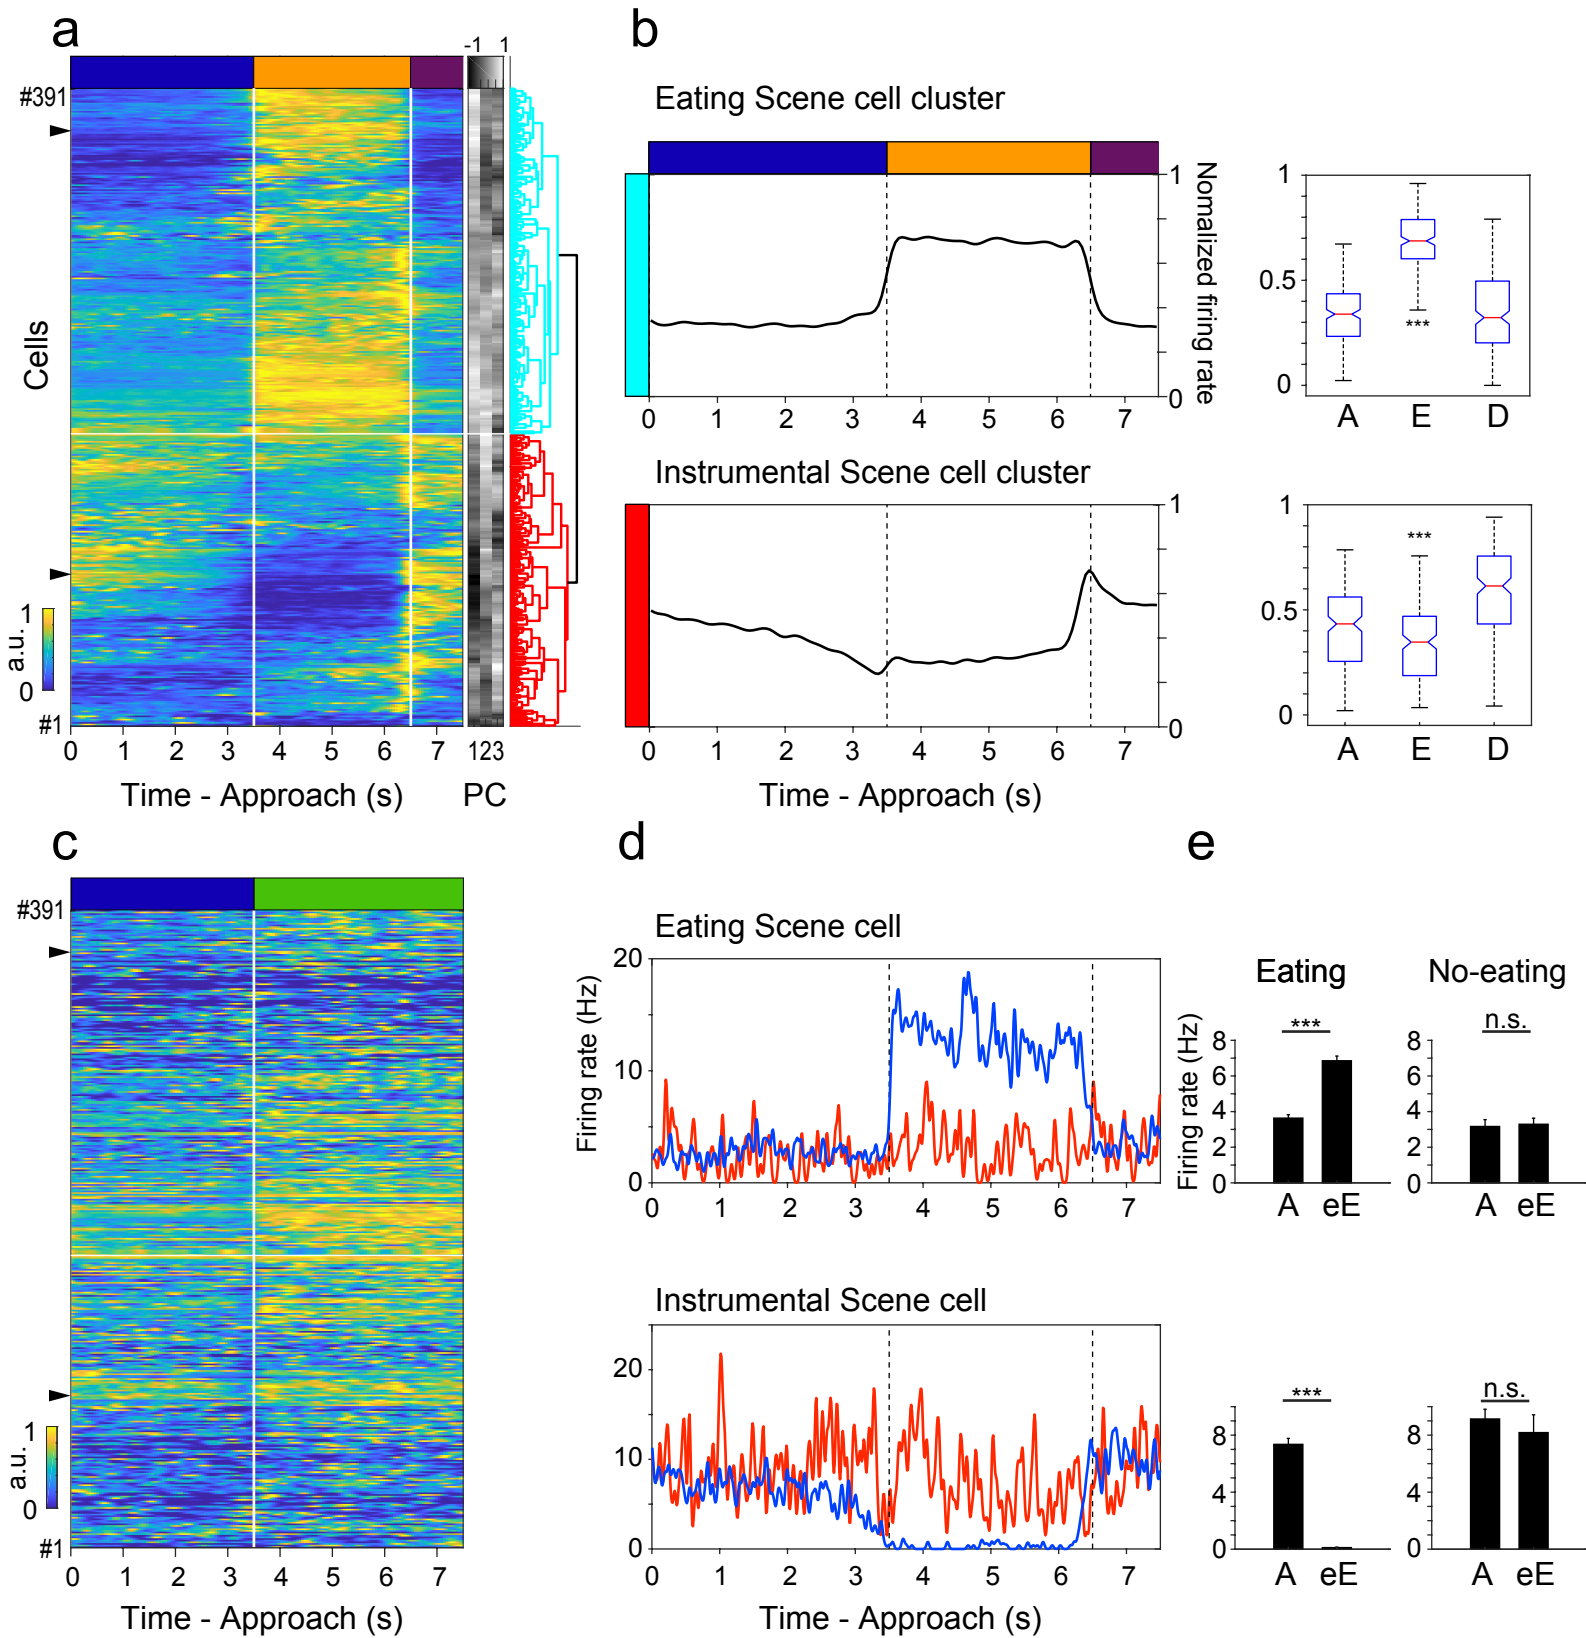

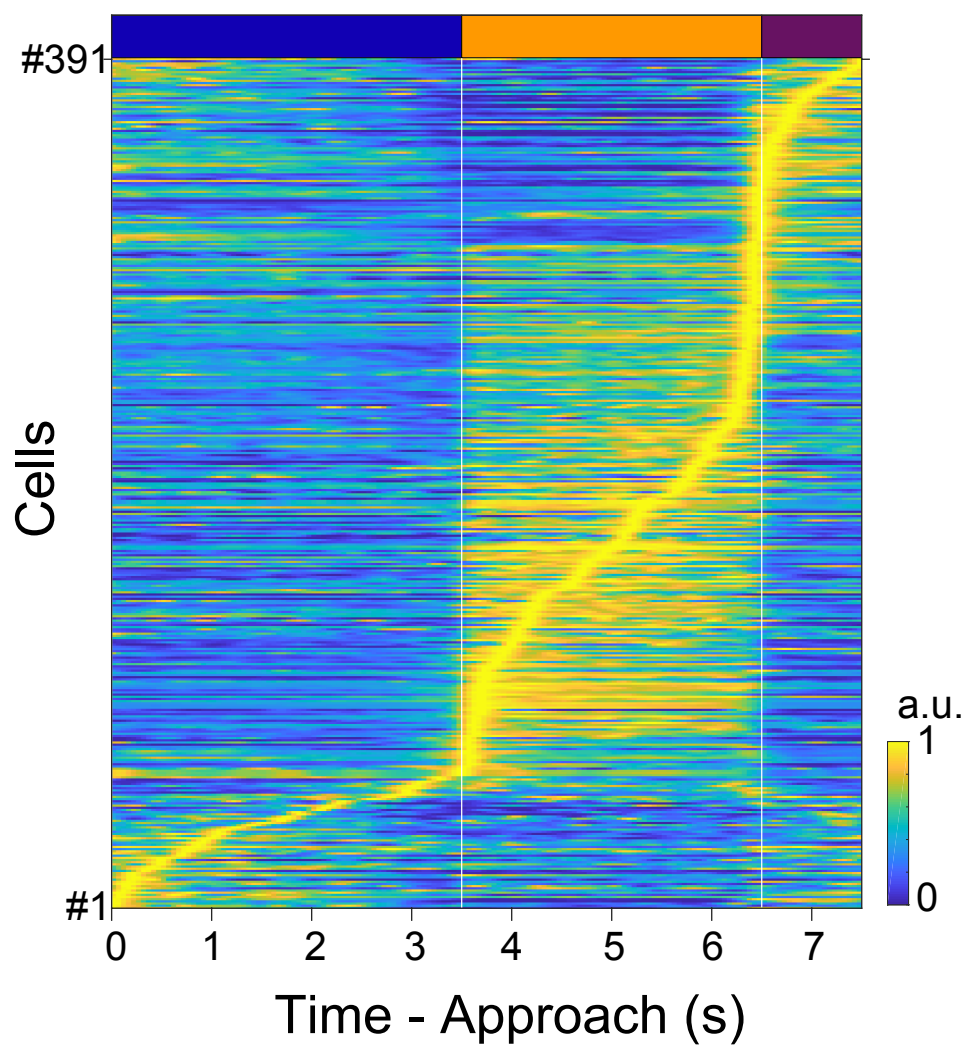

a-1  
Go Trial

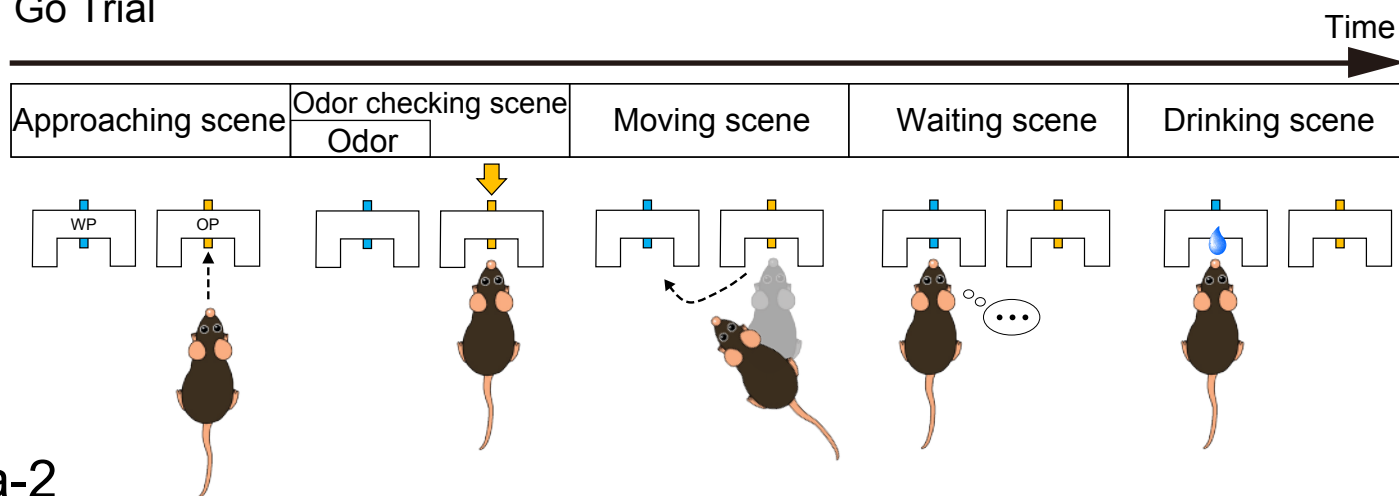

a-2  
No-go Trial

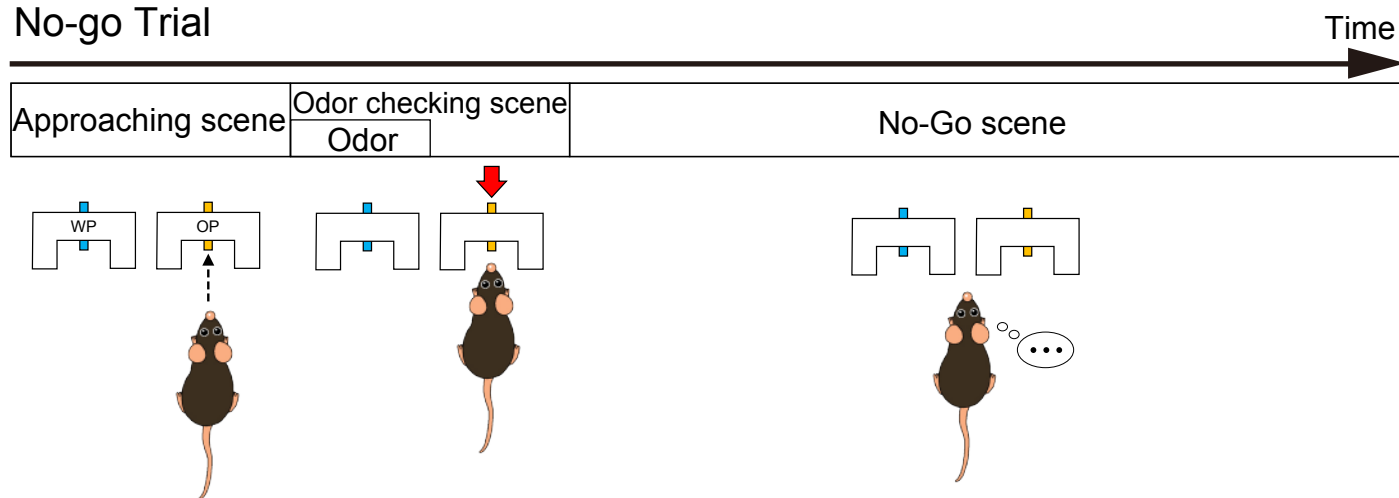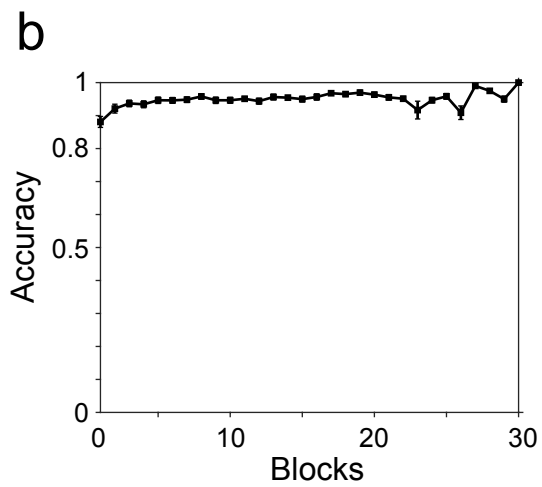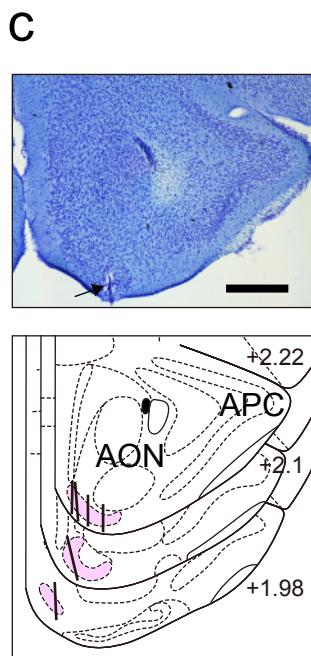

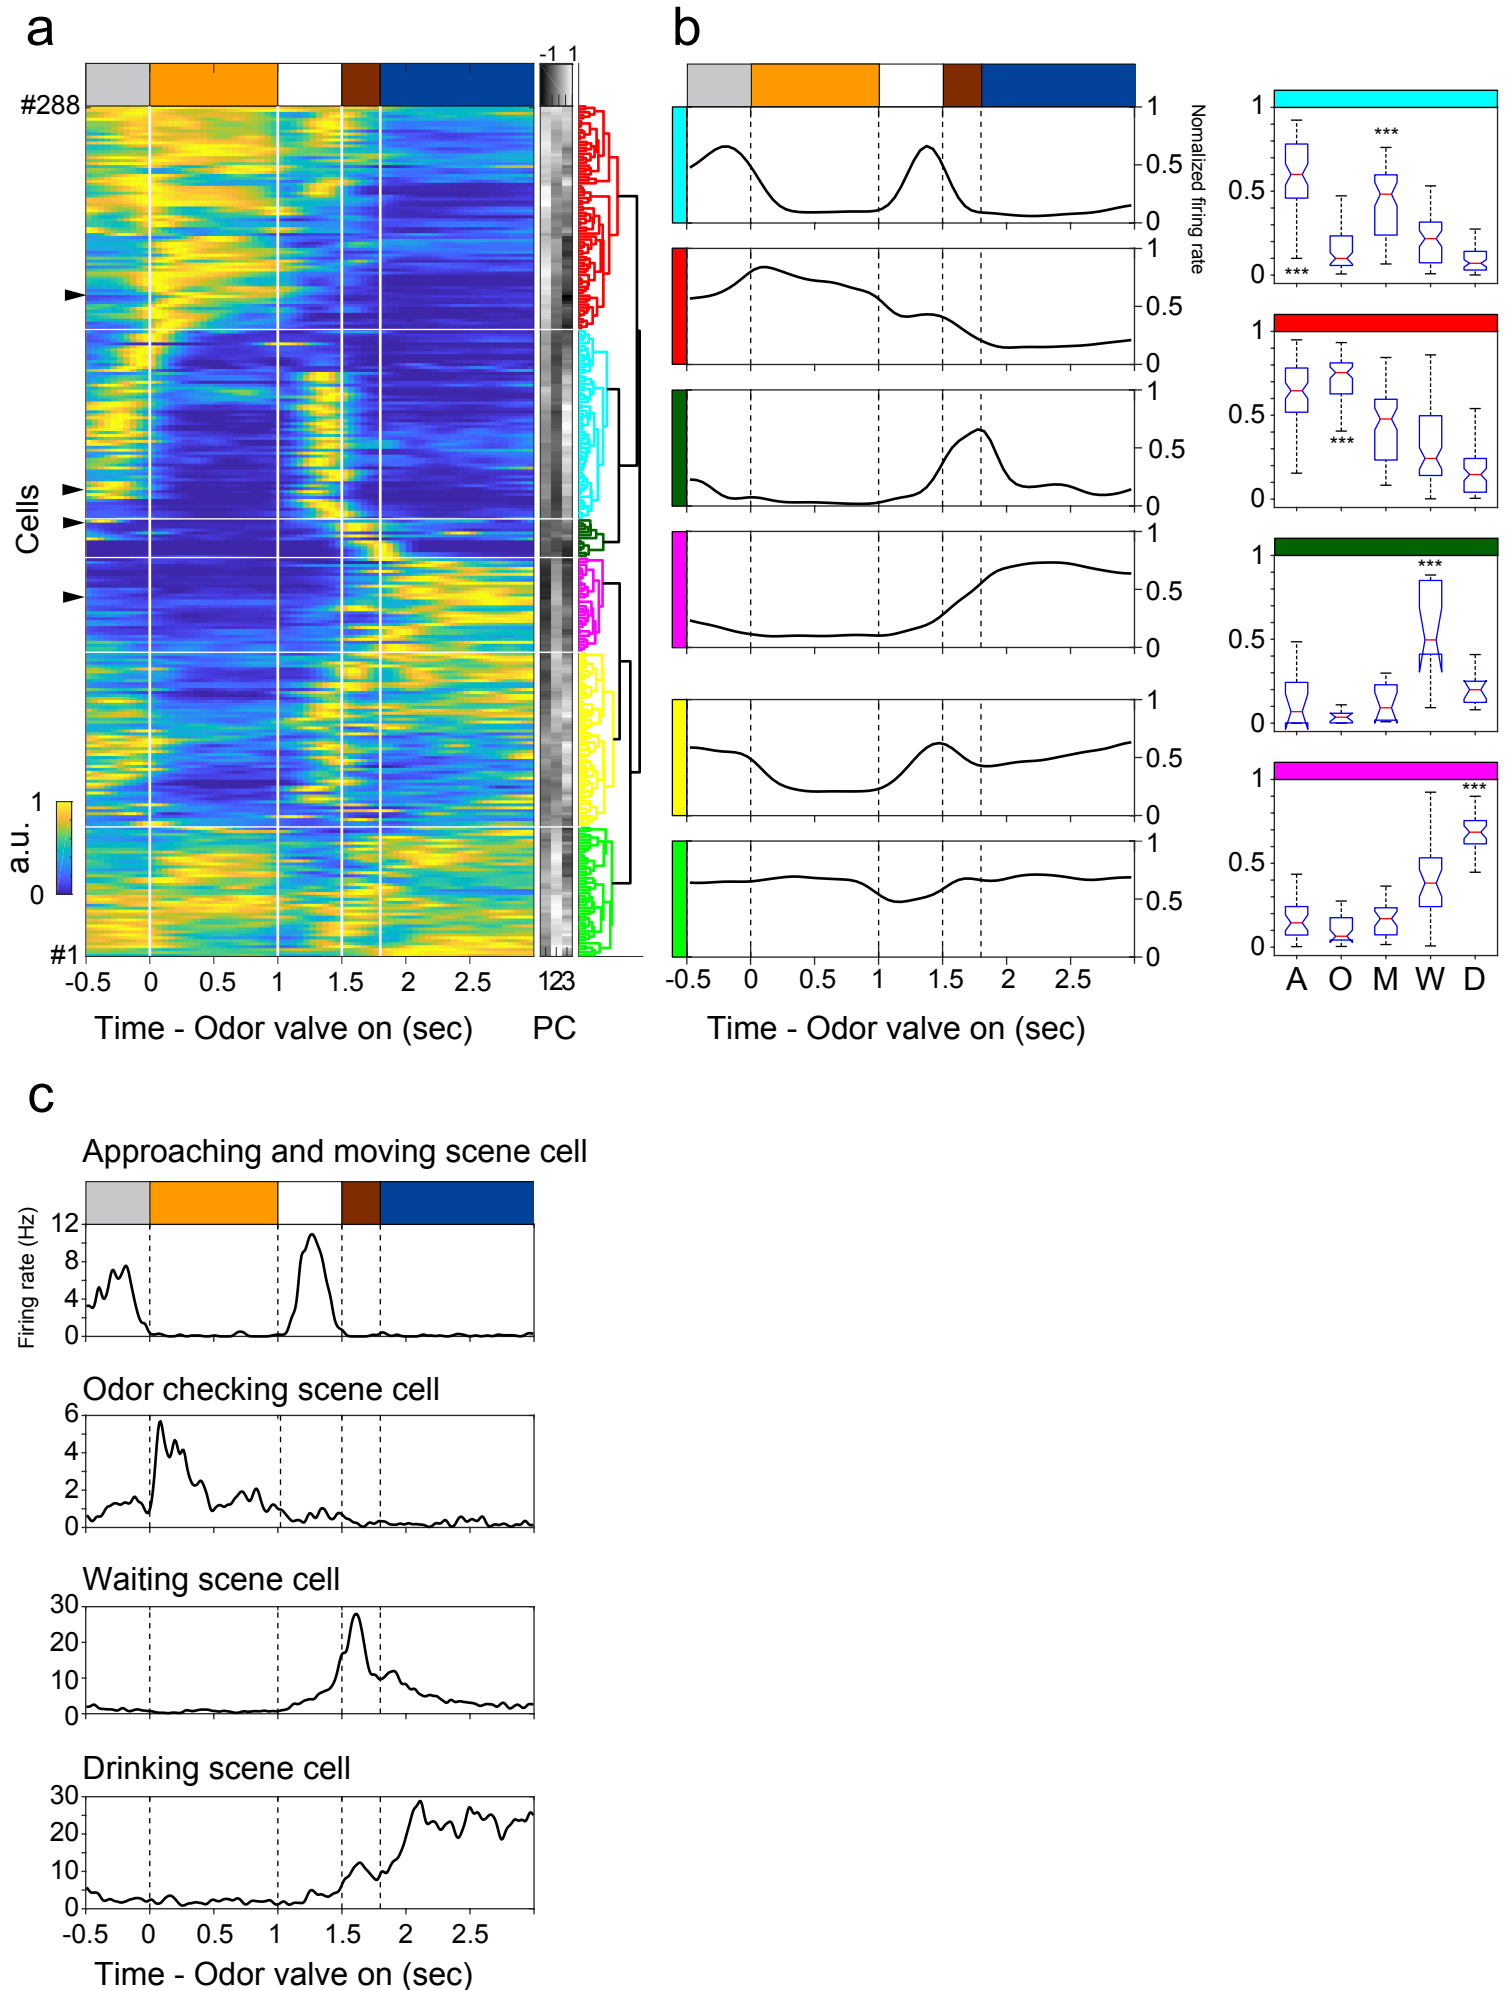

a

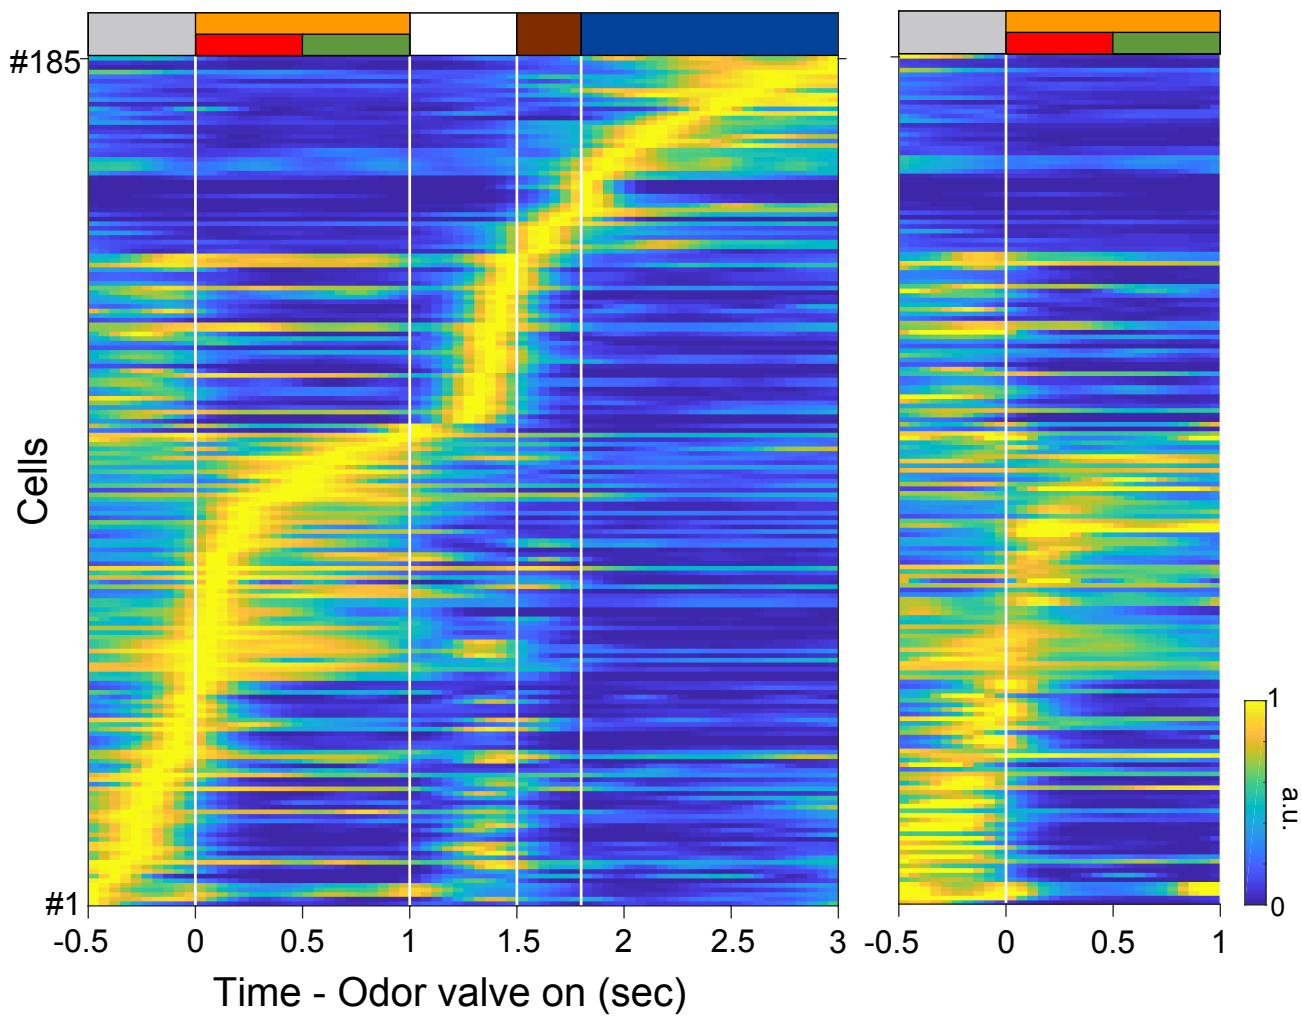

b

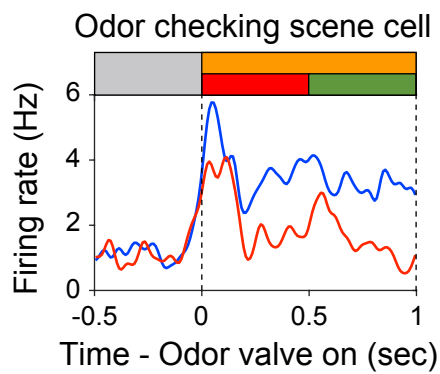

c

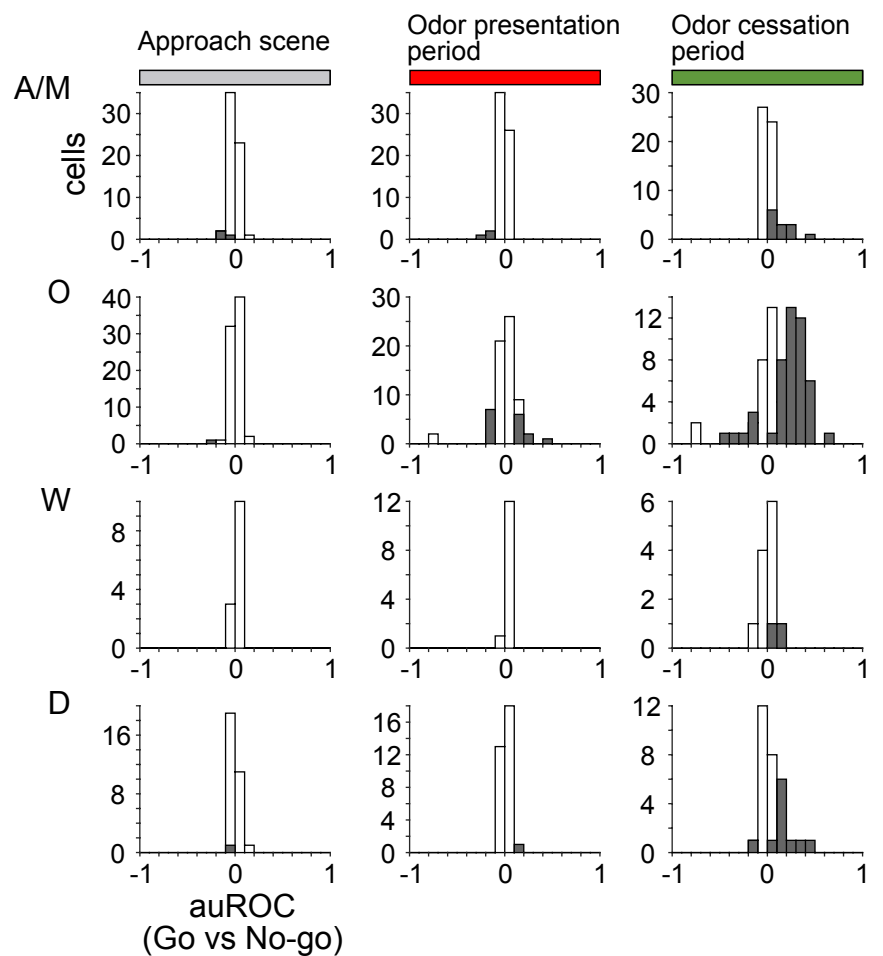

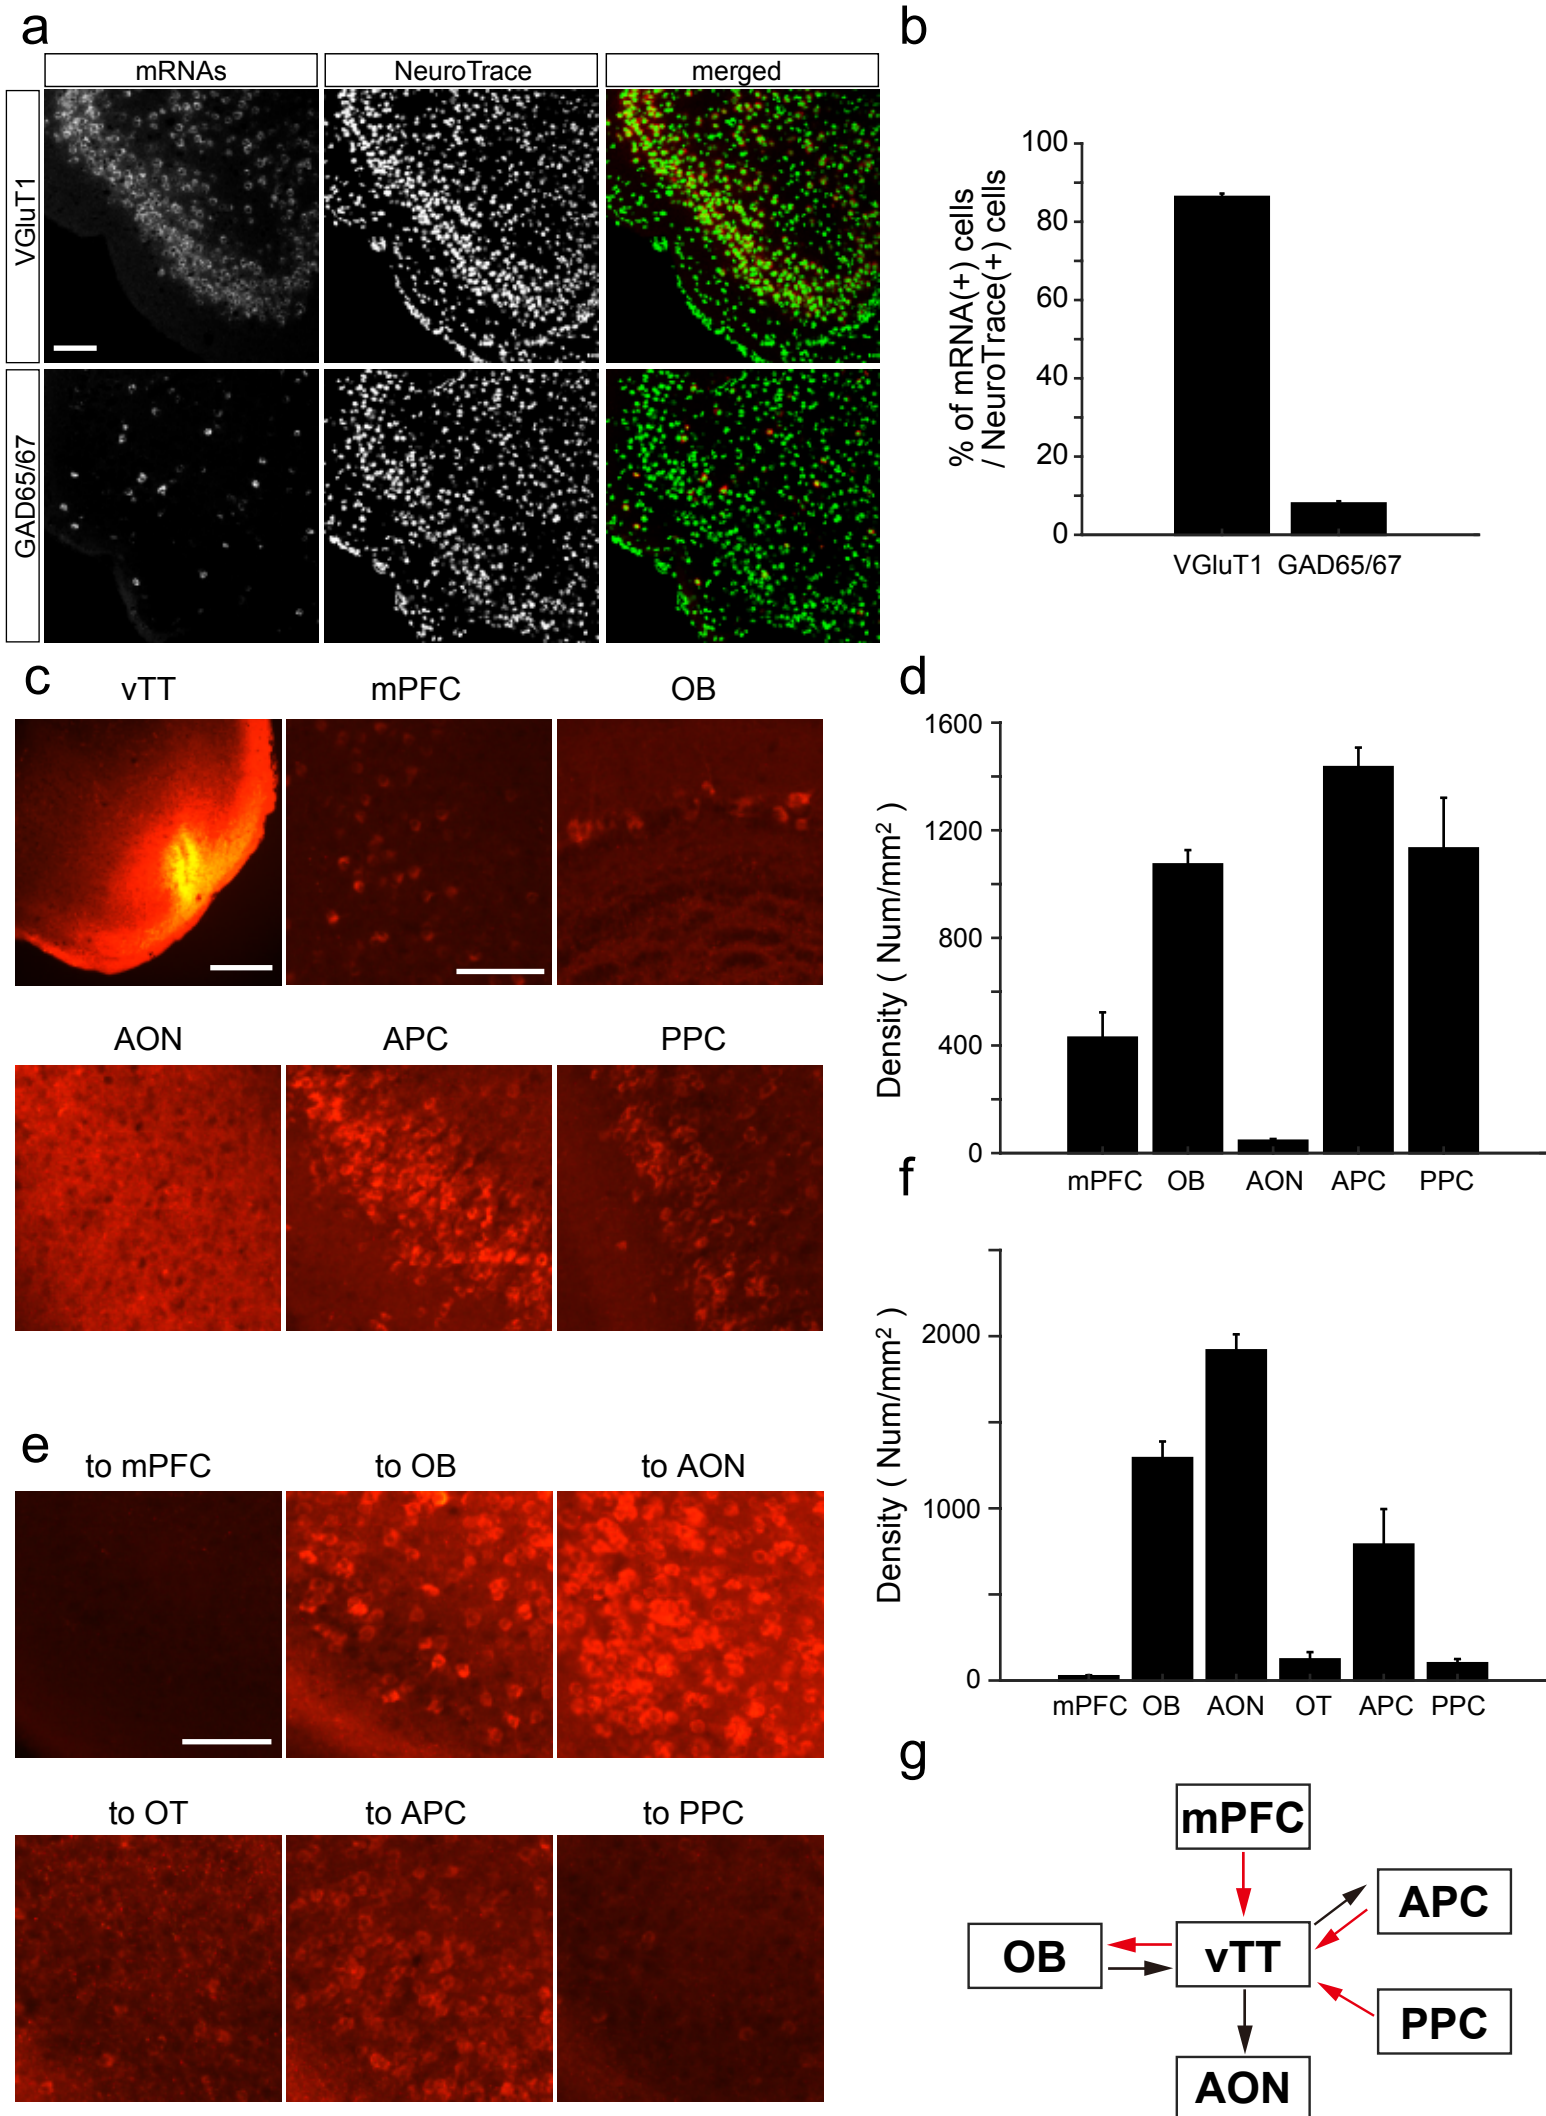

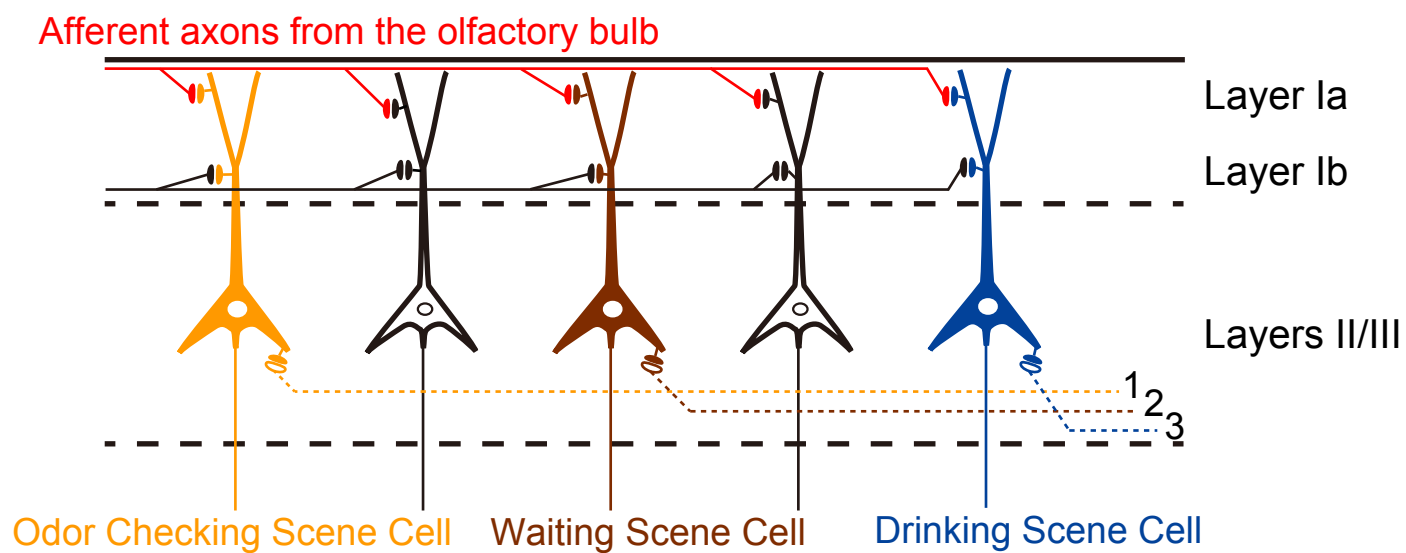

- 1: Odor Checking Scene-selective top-down signal
- 2: Waiting Scene-selective top-down signal
- 3: Drinking Scene-selective top-down signal
